# Supplementary material for: Regulation of lnc-TLCD2-1 on Radiation Sensitivity of Colorectal Cancer and Comprehensive Analysis of Its Mechanism
Source: Front Oncol. 2021 Jul 15;11:714159. doi: 10.3389/fonc.2021.714159 (PMC8320535; doi:10.3389/fonc.2021.714159)
Supplement: Supplemental Table 1 — Differential RNA of CCL244. [file Table_1.xls]

test_id	gene_id	gene	locus	sample_1	sample_2	status	value_1	value_2	log2(fold_change)	test_stat	p_value	q_value	significant
ENST00000007699	ENSG00000006047	YBX2	17:7184985-7197934	CCL244CONTROL1	CCL244R1	OK	1.62862	0.00124546	-10.3528	-0.121411	0.01635	0.942621	no
ENST00000007722	ENSG00000005884	ITGA3	17:48133331-48167845	CCL244CONTROL1	CCL244R1	OK	6.36803	0.00155107	-12.0034	-0.165299	0.0477	0.942621	no
ENST00000014914	ENSG00000013588	GPRC5A	12:13043715-13070871	CCL244CONTROL1	CCL244R1	OK	21.3418	6.64262	-1.68386	-2.21768	0.02945	0.942621	no
ENST00000019317	ENSG00000017797	RALBP1	18:9475006-9538114	CCL244CONTROL1	CCL244R1	OK	8.92205	1.41744	-2.65409	-2.358	0.0372	0.942621	no
ENST00000075120	ENSG00000059804	SLC2A3	12:8071825-8088871	CCL244CONTROL1	CCL244R1	OK	11.6459	1.77955	-2.71023	-3.13748	0.0036	0.942621	no
ENST00000164305	ENSG00000069943	PIGB	15:55495163-55800432	CCL244CONTROL1	CCL244R1	OK	0.00127234	2.60908	11.0018	0.187069	0.02195	0.942621	no
ENST00000167588	ENSG00000171431	KRT20	17:39032192-39041479	CCL244CONTROL1	CCL244R1	OK	2.98334	0.451427	-2.72436	-2.8937	0.0244	0.942621	no
ENST00000201031	ENSG00000087510	TFAP2C	20:55204357-55214339	CCL244CONTROL1	CCL244R1	OK	5.13749	1.88578	-1.4459	-2.15208	0.0354	0.942621	no
ENST00000215582	ENSG00000099812	MISP	19:751125-764319	CCL244CONTROL1	CCL244R1	OK	72.5099	31.338	-1.21026	-1.98171	0.0478	0.942621	no
ENST00000215956	ENSG00000100138	NHP2L1	22:42069933-42094140	CCL244CONTROL1	CCL244R1	OK	5.43434	0.000796483	-12.7362	-0.0982723	0.01405	0.942621	no
ENST00000216117	ENSG00000100292	HMOX1	22:35776353-35790207	CCL244CONTROL1	CCL244R1	OK	14.6021	4.77334	-1.6131	-2.54091	0.0132	0.942621	no
ENST00000216639	ENSG00000100749	VRK1	14:97263640-97551878	CCL244CONTROL1	CCL244R1	OK	5.011	15.7328	1.6506	2.05496	0.0429	0.942621	no
ENST00000217446	ENSG00000101464	PIGU	20:33148345-33264910	CCL244CONTROL1	CCL244R1	OK	1.674	6.66254	1.99277	2.1815	0.0349	0.942621	no
ENST00000217939	ENSG00000101825	MXRA5	X:3226605-3264682	CCL244CONTROL1	CCL244R1	OK	1.34446	0.0541868	-4.63294	-4.65674	0.01865	0.942621	no
ENST00000217971	ENSG00000101856	PGRMC1	X:118370215-118378429	CCL244CONTROL1	CCL244R1	OK	13.1511	29.9027	1.18509	2.03094	0.044	0.942621	no
ENST00000220669	ENSG00000104231	ZFAND1	8:82613565-82671750	CCL244CONTROL1	CCL244R1	OK	0.00138848	4.14224	11.5427	0.173516	0.0192	0.942621	no
ENST00000221455	ENSG00000104859	CLASRP	19:45542297-45574214	CCL244CONTROL1	CCL244R1	OK	0.00239304	1.4679	9.26069	0.305412	0.04365	0.942621	no
ENST00000221554	ENSG00000104957	CCDC130	19:13842573-13874110	CCL244CONTROL1	CCL244R1	OK	2.51567	0.0015286	-10.6845	-0.176161	0.02375	0.942621	no
ENST00000227214	ENSG00000021300	PLEKHB1	11:73357222-73373864	CCL244CONTROL1	CCL244R1	OK	3.88359	1.18796	-1.70891	-2.21513	0.0392	0.942621	no
ENST00000229022	ENSG00000111424	VDR	12:48235319-48336831	CCL244CONTROL1	CCL244R1	OK	1.16555	0.00128566	-9.82428	-0.391527	0.0487	0.942621	no
ENST00000229266	ENSG00000111666	CHPT1	12:102089779-102137918	CCL244CONTROL1	CCL244R1	OK	2.95378	0.00112568	-11.3575	-0.119954	0.013	0.942621	no
ENST00000229758	ENSG00000112029	FBXO5	6:153291663-153304714	CCL244CONTROL1	CCL244R1	OK	2.20066	7.46484	1.76218	2.13148	0.03525	0.942621	no
ENST00000229769	ENSG00000112039	FANCE	6:35420137-35434880	CCL244CONTROL1	CCL244R1	OK	1.81894	6.70254	1.88161	2.85774	0.00635	0.942621	no
ENST00000229854	ENSG00000112118	MCM3	6:52128806-52150390	CCL244CONTROL1	CCL244R1	OK	6.96808	33.4271	2.26219	3.46959	0.00055	0.768663	no
ENST00000233146	ENSG00000095002	MSH2	2:47630107-47798078	CCL244CONTROL1	CCL244R1	OK	3.97515	10.8668	1.45085	1.9693	0.04695	0.942621	no
ENST00000239243	ENSG00000120149	MSX2	5:174151535-174157896	CCL244CONTROL1	CCL244R1	OK	12.8725	5.19303	-1.30964	-2.0333	0.04165	0.942621	no
ENST00000239938	ENSG00000120738	EGR1	5:137801178-137805004	CCL244CONTROL1	CCL244R1	OK	1.94969	5.54635	1.5083	2.35148	0.0249	0.942621	no
ENST00000240100	ENSG00000120875	DUSP4	8:29190579-29208185	CCL244CONTROL1	CCL244R1	OK	9.8824	3.39342	-1.54212	-2.48156	0.01245	0.942621	no
ENST00000242576	ENSG00000076248	UNG	12:109535378-109548797	CCL244CONTROL1	CCL244R1	OK	2.49377	13.4061	2.42648	2.43341	0.034	0.942621	no
ENST00000242770	ENSG00000104915	STX10	19:13254871-13265722	CCL244CONTROL1	CCL244R1	OK	0.0017043	8.99392	12.3656	0.128237	0.02405	0.942621	no
ENST00000244534	ENSG00000124575	HIST1H1D	6:26234439-26235216	CCL244CONTROL1	CCL244R1	OK	114.957	1898.35	4.04558	5.09579	0.00025	0.495911	no
ENST00000244601	ENSG00000187990	HIST1H2BG	6:26216427-26216872	CCL244CONTROL1	CCL244R1	OK	132.909	1362.35	3.35758	5.23181	5e-05	0.122986	no
ENST00000244661	ENSG00000124693	HIST1H3B	6:26031816-26032288	CCL244CONTROL1	CCL244R1	OK	604.34	6016.37	3.31546	3.68804	0.00305	0.942621	no
ENST00000244741	ENSG00000124762	CDKN1A	6:36644304-36655116	CCL244CONTROL1	CCL244R1	OK	292.745	77.9548	-1.90894	-2.38056	0.02605	0.942621	no
ENST00000244745	ENSG00000124766	SOX4	6:21593971-21598850	CCL244CONTROL1	CCL244R1	OK	13.6381	5.33626	-1.35374	-2.09764	0.03945	0.942621	no
ENST00000245323	ENSG00000125266	EFNB2	13:107142078-107187462	CCL244CONTROL1	CCL244R1	OK	6.22505	2.03375	-1.61394	-2.65027	0.01075	0.942621	no
ENST00000245479	ENSG00000125398	SOX9	17:70017991-70216859	CCL244CONTROL1	CCL244R1	OK	42.1451	17.4488	-1.27224	-2.10615	0.0332	0.942621	no
ENST00000246635	ENSG00000171401	KRT13	17:39657232-39661957	CCL244CONTROL1	CCL244R1	OK	7.02174	0.00374693	-10.8719	-0.413506	0.0496	0.942621	no
ENST00000246792	ENSG00000126458	RRAS	19:50138548-50143458	CCL244CONTROL1	CCL244R1	OK	28.0545	10.9158	-1.36181	-2.0548	0.0462	0.942621	no
ENST00000247843	ENSG00000127337	YEATS4	12:69753482-69784576	CCL244CONTROL1	CCL244R1	OK	2.70191	9.28186	1.78043	2.11483	0.0382	0.942621	no
ENST00000248553	ENSG00000106211	HSPB1	7:75931860-75933612	CCL244CONTROL1	CCL244R1	OK	83.908	36.3766	-1.2058	-1.99701	0.04365	0.942621	no
ENST00000249005	ENSG00000128274	A4GALT	22:43088126-43117304	CCL244CONTROL1	CCL244R1	OK	1.88434	0.00277398	-9.40789	-0.321791	0.041	0.942621	no
ENST00000249071	ENSG00000128340	RAC2	22:37621300-37640488	CCL244CONTROL1	CCL244R1	OK	8.14938	1.35275	-2.59079	-2.54437	0.04235	0.942621	no
ENST00000250124	ENSG00000129255	MPDU1	17:7465191-7536700	CCL244CONTROL1	CCL244R1	OK	3.40062e-06	3.65743	20.0366	0.000646708	0.03295	0.942621	no
ENST00000250448	ENSG00000129514	FOXA1	14:38059188-38672731	CCL244CONTROL1	CCL244R1	OK	19.2306	6.00342	-1.67955	-2.35912	0.02335	0.942621	no
ENST00000252015	ENSG00000100991	TRPC4AP	20:33563205-33680674	CCL244CONTROL1	CCL244R1	OK	0.000349813	4.96345	13.7925	0.098984	0.01085	0.942621	no
ENST00000254636	ENSG00000132305	IMMT	2:86371054-86423798	CCL244CONTROL1	CCL244R1	OK	0.000791626	3.39756	12.0674	0.15625	0.0181	0.942621	no
ENST00000255006	ENSG00000132669	RIN2	20:19867164-19983101	CCL244CONTROL1	CCL244R1	OK	1.25238	0.000738595	-10.7276	-0.231292	0.02675	0.942621	no
ENST00000255559	ENSG00000133195	SLC39A11	17:70642087-71088851	CCL244CONTROL1	CCL244R1	OK	3.78271	0.00141439	-11.385	-0.276912	0.0324	0.942621	no
ENST00000256585	ENSG00000134193	REG4	1:120336640-120354283	CCL244CONTROL1	CCL244R1	OK	12.3402	1.9332	-2.6743	-3.18221	0.00735	0.942621	no
ENST00000256951	ENSG00000134531	EMP1	12:13349649-13369708	CCL244CONTROL1	CCL244R1	OK	14.9958	3.17811	-2.23832	-3.48077	0.00125	0.942621	no
ENST00000257570	ENSG00000135114	OASL	12:121458094-121477045	CCL244CONTROL1	CCL244R1	OK	2.65546	0.826884	-1.6832	-2.12722	0.04145	0.942621	no
ENST00000257770	ENSG00000135318	NT5E	6:86159808-86205500	CCL244CONTROL1	CCL244R1	OK	0.72976	3.46652	2.248	2.43551	0.0226	0.942621	no
ENST00000258443	ENSG00000135960	EDAR	2:109510926-109605828	CCL244CONTROL1	CCL244R1	OK	1.27656	0.38772	-1.71918	-2.16485	0.0405	0.942621	no
ENST00000258534	ENSG00000136048	DRAM1	12:102271128-102405908	CCL244CONTROL1	CCL244R1	OK	6.36662	2.34953	-1.43815	-2.13408	0.0325	0.942621	no
ENST00000259056	ENSG00000136542	GALNT5	2:158114109-158170723	CCL244CONTROL1	CCL244R1	OK	3.19459	1.30601	-1.29046	-1.98071	0.0493	0.942621	no
ENST00000259154	ENSG00000136636	KCTD3	1:215740734-215795149	CCL244CONTROL1	CCL244R1	OK	3.42737	8.93229	1.38193	2.1512	0.03	0.942621	no
ENST00000259234	ENSG00000136715	SAP130	2:128698790-128785694	CCL244CONTROL1	CCL244R1	OK	0.000741112	1.14757	10.5966	0.209798	0.0264	0.942621	no
ENST00000259235	ENSG00000136715	SAP130	2:128698790-128785694	CCL244CONTROL1	CCL244R1	OK	1.48422	0.00108436	-10.4186	-0.296049	0.03905	0.942621	no
ENST00000259318	ENSG00000241978	AKAP2	9:112401575-112938715	CCL244CONTROL1	CCL244R1	OK	2.16804	0.000321526	-12.7192	-0.0804313	0.0106	0.942621	no
ENST00000259711	ENSG00000137177	KIF13A	6:17759413-17987854	CCL244CONTROL1	CCL244R1	OK	0.320324	2.13862	2.73908	2.27427	0.03735	0.942621	no
ENST00000259751	ENSG00000137221	TJAP1	6:43445260-43474294	CCL244CONTROL1	CCL244R1	OK	1.13342	0.00135708	-9.70597	-0.224949	0.0291	0.942621	no
ENST00000259791	ENSG00000137259	HIST1H2AB	6:26033319-26033796	CCL244CONTROL1	CCL244R1	OK	178.795	2083.85	3.54288	5.0996	5e-05	0.122986	no
ENST00000259873	ENSG00000204568	MRPS18B	6:30568176-30614600	CCL244CONTROL1	CCL244R1	OK	0.00047025	4.71321	13.291	0.0563949	0.01015	0.942621	no
ENST00000260356	ENSG00000137801	THBS1	15:39873279-39891667	CCL244CONTROL1	CCL244R1	OK	95.4612	21.1836	-2.17197	-2.6695	0.008	0.942621	no
ENST00000260702	ENSG00000138131	LOXL4	10:100007446-100028007	CCL244CONTROL1	CCL244R1	OK	8.1889	1.50595	-2.44299	-3.78884	0.001	0.942621	no
ENST00000260762	ENSG00000138190	EXOC6	10:94590934-94819250	CCL244CONTROL1	CCL244R1	OK	0.88195	3.95124	2.16354	2.17158	0.04095	0.942621	no
ENST00000260926	ENSG00000119042	SATB2	2:200134222-200341658	CCL244CONTROL1	CCL244R1	OK	2.35497	0.616591	-1.93332	-1.12068	0.0423	0.942621	no
ENST00000261292	ENSG00000101670	LIPG	18:47087068-47119276	CCL244CONTROL1	CCL244R1	OK	3.93544	1.21719	-1.69297	-2.17259	0.03865	0.942621	no
ENST00000262065	ENSG00000108960	MMD	17:53469973-53499353	CCL244CONTROL1	CCL244R1	OK	2.30919	7.60698	1.71994	2.50466	0.0156	0.942621	no
ENST00000262138	ENSG00000075461	CACNG4	17:64961025-65029514	CCL244CONTROL1	CCL244R1	OK	1.4789	0.381574	-1.95449	-2.27835	0.0318	0.942621	no
ENST00000262288	ENSG00000121064	SCPEP1	17:55055465-55084129	CCL244CONTROL1	CCL244R1	OK	1.88257	0.00124527	-10.562	-0.155247	0.02115	0.942621	no
ENST00000262428	ENSG00000103187	COTL1	16:84599199-84651683	CCL244CONTROL1	CCL244R1	OK	7.80927	27.8091	1.8323	2.14815	0.0351	0.942621	no
ENST00000262455	ENSG00000023318	ERP44	9:102741460-102861322	CCL244CONTROL1	CCL244R1	OK	6.77423	2.6812	-1.33718	-2.23966	0.0294	0.942621	no
ENST00000262585	ENSG00000105339	DENND3	8:142127376-142205907	CCL244CONTROL1	CCL244R1	OK	1.37381	0.000350265	-11.9375	-0.148524	0.01595	0.942621	no
ENST00000262952	ENSG00000034063	UHRF1	19:4903091-4962165	CCL244CONTROL1	CCL244R1	OK	2.26053	11.0393	2.28792	2.95309	0.00435	0.942621	no
ENST00000263088	ENSG00000129219	PLD2	17:4710390-4726729	CCL244CONTROL1	CCL244R1	OK	1.14935	0.000404344	-11.4729	-0.103884	0.0362	0.942621	no
ENST00000263379	ENSG00000104998	IL27RA	19:14142559-14163743	CCL244CONTROL1	CCL244R1	OK	4.35788	10.4291	1.25891	2.08868	0.04175	0.942621	no
ENST00000263563	ENSG00000107719	PALD1	10:72238576-72328205	CCL244CONTROL1	CCL244R1	OK	6.89348	15.4013	1.15975	2.01033	0.044	0.942621	no
ENST00000263694	ENSG00000060688	SNRNP40	1:31732416-31769662	CCL244CONTROL1	CCL244R1	OK	25.6315	65.5951	1.35567	2.06192	0.03985	0.942621	no
ENST00000264012	ENSG00000062038	CDH3	16:68670091-68761392	CCL244CONTROL1	CCL244R1	OK	2.37988	0.000803897	-11.5316	-0.155637	0.025	0.942621	no
ENST00000264156	ENSG00000076003	MCM6	2:136597195-136633996	CCL244CONTROL1	CCL244R1	OK	4.00259	12.9492	1.69385	2.76418	0.0061	0.942621	no
ENST00000264474	ENSG00000121552	CSTA	3:122044090-122060819	CCL244CONTROL1	CCL244R1	OK	0	1.57772	1.36609556216735	NA	0.0012	0.942621	no
ENST00000265036	ENSG00000035499	DEPDC1B	5:59892738-59997833	CCL244CONTROL1	CCL244R1	OK	1.568	6.02414	1.94183	2.32417	0.0208	0.942621	no
ENST00000265562	ENSG00000076201	PTPN23	3:47422500-47454931	CCL244CONTROL1	CCL244R1	OK	3.19866	0.000993005	-11.6534	-0.395781	0.04655	0.942621	no
ENST00000266085	ENSG00000100234	TIMP3	22:32908538-33454358	CCL244CONTROL1	CCL244R1	OK	8.10528	2.12558	-1.931	-2.94879	0.0049	0.942621	no
ENST00000266254	ENSG00000100271	TTLL1	22:43434590-43485434	CCL244CONTROL1	CCL244R1	OK	9.62963	3.00106	-1.68201	-2.49374	0.0139	0.942621	no
ENST00000266742	ENSG00000139350	NEDD1	12:97301000-97347129	CCL244CONTROL1	CCL244R1	OK	0.00176006	2.65654	10.5597	0.430864	0.04885	0.942621	no
ENST00000268797	ENSG00000141098	GFOD2	16:67708433-67753324	CCL244CONTROL1	CCL244R1	OK	0.000699576	3.07868	12.1035	0.110523	0.0367	0.942621	no
ENST00000269159	ENSG00000141401	IMPA2	18:11981023-12030876	CCL244CONTROL1	CCL244R1	OK	4.85033	15.5835	1.68387	2.00114	0.0494	0.942621	no
ENST00000269217	ENSG00000053747	LAMA3	18:21269406-21535030	CCL244CONTROL1	CCL244R1	OK	7.19691	0.913784	-2.97745	-2.55946	0.03195	0.942621	no
ENST00000270162	ENSG00000142178	SIK1	21:44834394-44847008	CCL244CONTROL1	CCL244R1	OK	5.93857	1.50609	-1.97931	-3.07689	0.00365	0.942621	no
ENST00000270233	ENSG00000187244	BCAM	19:45312327-45324673	CCL244CONTROL1	CCL244R1	OK	20.207	4.00013	-2.33674	-2.93177	0.00685	0.942621	no
ENST00000271636	ENSG00000143375	CGN	1:151482985-151511168	CCL244CONTROL1	CCL244R1	OK	3.0418	0.914681	-1.73359	-2.03008	0.04215	0.942621	no
ENST00000271638	ENSG00000163191	S100A11	1:151967006-152020383	CCL244CONTROL1	CCL244R1	OK	48.7259	18.1185	-1.42722	-2.16697	0.0345	0.942621	no
ENST00000272462	ENSG00000144063	MALL	2:110841446-110874143	CCL244CONTROL1	CCL244R1	OK	8.79129	3.57498	-1.29814	-2.1271	0.0308	0.942621	no
ENST00000273512	ENSG00000144959	NCEH1	3:172348038-172443930	CCL244CONTROL1	CCL244R1	OK	7.66837	2.43986	-1.65212	-2.45335	0.01305	0.942621	no
ENST00000274000	ENSG00000138660	AP1AR	4:113152892-113191203	CCL244CONTROL1	CCL244R1	OK	1.85302	6.57339	1.82676	2.16715	0.0328	0.942621	no
ENST00000274026	ENSG00000145386	CCNA2	4:122722471-122745087	CCL244CONTROL1	CCL244R1	OK	9.03254	28.8391	1.67482	2.34262	0.02075	0.942621	no
ENST00000274054	ENSG00000145414	NAF1	4:164028213-164093463	CCL244CONTROL1	CCL244R1	OK	1.46524	0.00241116	-9.24719	-0.257832	0.0428	0.942621	no
ENST00000274255	ENSG00000145604	SKP2	5:36152090-36184421	CCL244CONTROL1	CCL244R1	OK	2.07884	6.26022	1.59043	1.97902	0.0488	0.942621	no
ENST00000274289	ENSG00000145632	PLK2	5:57749808-57756087	CCL244CONTROL1	CCL244R1	OK	32.0011	5.43549	-2.55764	-2.29601	0.03195	0.942621	no
ENST00000275072	ENSG00000146281	PM20D2	6:89855768-89875284	CCL244CONTROL1	CCL244R1	OK	2.92854	8.15043	1.4767	2.4989	0.01475	0.942621	no
ENST00000275517	ENSG00000146670	CDCA5	11:64833771-64851636	CCL244CONTROL1	CCL244R1	OK	3.02297	8.78676	1.53936	2.20619	0.03015	0.942621	no
ENST00000275605	ENSG00000146733	PSPH	7:56078743-56119297	CCL244CONTROL1	CCL244R1	OK	0.000852729	2.65163	11.6025	0.129472	0.0159	0.942621	no
ENST00000277541	ENSG00000148400	NOTCH1	9:139388895-139440314	CCL244CONTROL1	CCL244R1	OK	5.70376	2.24833	-1.34306	-2.30756	0.01905	0.942621	no
ENST00000278174	ENSG00000148925	BTBD10	11:13409547-13484844	CCL244CONTROL1	CCL244R1	OK	0.00214262	3.30883	10.5927	0.250591	0.0439	0.942621	no
ENST00000278483	ENSG00000149196	C11orf73	11:86013252-86056985	CCL244CONTROL1	CCL244R1	OK	3.51217	15.1985	2.11349	2.15622	0.04525	0.942621	no
ENST00000279873	ENSG00000150347	ARID5B	10:63661058-63856703	CCL244CONTROL1	CCL244R1	OK	6.04533	2.08303	-1.53714	-2.58808	0.0116	0.942621	no
ENST00000280591	ENSG00000072756	TRNT1	3:3168599-3221394	CCL244CONTROL1	CCL244R1	OK	0.000438682	2.94607	12.7133	0.074839	0.02965	0.942621	no
ENST00000281938	ENSG00000152137	HSPB8	12:119616446-119658936	CCL244CONTROL1	CCL244R1	OK	1.88686	0.533578	-1.82221	-2.12881	0.04955	0.942621	no
ENST00000282276	ENSG00000247626	MARS2	2:198557829-198651486	CCL244CONTROL1	CCL244R1	OK	6.29218	2.14627	-1.55173	-2.40759	0.0198	0.942621	no
ENST00000286713	ENSG00000148175	STOM	9:124101265-124132582	CCL244CONTROL1	CCL244R1	OK	11.475	2.28255	-2.32978	-2.94396	0.00475	0.942621	no
ENST00000287025	ENSG00000156469	MTERFD1	8:97251625-97273838	CCL244CONTROL1	CCL244R1	OK	1.65075	11.2753	2.77197	3.56783	0.0034	0.942621	no
ENST00000290075	ENSG00000147454	SLC25A37	8:23386317-23432976	CCL244CONTROL1	CCL244R1	OK	4.26205	0.000512073	-13.0229	-0.0763217	0.0195	0.942621	no
ENST00000290246	ENSG00000062598	ELMO2	20:44994687-45088009	CCL244CONTROL1	CCL244R1	OK	1.37359	0.000492622	-11.4452	-0.132614	0.01645	0.942621	no
ENST00000290810	ENSG00000159593	NAE1	16:66836777-66907159	CCL244CONTROL1	CCL244R1	OK	2.90436	14.5229	2.32203	2.28118	0.0417	0.942621	no
ENST00000291526	ENSG00000160181	TFF2	21:43766465-43771237	CCL244CONTROL1	CCL244R1	OK	1.40034	0	-1.26323877315558	NA	0.0036	0.942621	no
ENST00000291560	ENSG00000160207	HSF2BP	21:44949071-45079374	CCL244CONTROL1	CCL244R1	OK	1.32186	0.00106341	-10.2797	-0.125851	0.0177	0.942621	no
ENST00000292410	ENSG00000160867	FGFR4	5:176513886-176525145	CCL244CONTROL1	CCL244R1	OK	1.07	0.00051879	-11.0102	-0.105633	0.01785	0.942621	no
ENST00000294952	ENSG00000162869	PPP1R21	2:48667181-48742525	CCL244CONTROL1	CCL244R1	OK	0.00180578	1.95303	10.0789	0.362889	0.0474	0.942621	no
ENST00000295190	ENSG00000163053	SLC16A14	2:230899697-230933715	CCL244CONTROL1	CCL244R1	OK	0.380561	1.69693	2.15673	2.4983	0.02375	0.942621	no
ENST00000295488	ENSG00000163312	HELQ	4:84328495-84377009	CCL244CONTROL1	CCL244R1	OK	1.98613	0.00163476	-10.2467	-0.383709	0.0499	0.942621	no
ENST00000296027	ENSG00000163735	CXCL5	4:74861358-74864496	CCL244CONTROL1	CCL244R1	OK	15.8377	49.2415	1.63651	2.77229	0.0051	0.942621	no
ENST00000296252	ENSG00000163898	LIPH	3:185224049-185270401	CCL244CONTROL1	CCL244R1	OK	2.95074	0.731081	-2.01297	-2.38727	0.0206	0.942621	no
ENST00000296440	ENSG00000164050	PLXNB1	3:48445260-48471594	CCL244CONTROL1	CCL244R1	OK	1.91067	0.189464	-3.33408	-2.04031	0.0024	0.942621	no
ENST00000296585	ENSG00000164171	ITGA2	5:51971026-52390609	CCL244CONTROL1	CCL244R1	OK	15.1488	1.77435	-3.09384	-2.59742	0.03155	0.942621	no
ENST00000296595	ENSG00000164180	TMEM161B	5:87484994-87794514	CCL244CONTROL1	CCL244R1	OK	0.000401315	3.21645	12.9684	0.0844568	0.0084	0.942621	no
ENST00000296666	ENSG00000164244	PRRC1	5:126853300-126890781	CCL244CONTROL1	CCL244R1	OK	10.6126	4.56087	-1.2184	-1.91019	0.04695	0.942621	no
ENST00000296677	ENSG00000164251	F2RL1	5:76114757-76131140	CCL244CONTROL1	CCL244R1	OK	46.1668	16.822	-1.45651	-2.22332	0.02855	0.942621	no
ENST00000296782	ENSG00000164327	RICTOR	5:38845959-39074510	CCL244CONTROL1	CCL244R1	OK	0.000812402	1.1601	10.4798	0.298188	0.0491	0.942621	no
ENST00000296839	ENSG00000164379	FOXQ1	6:1143794-1411187	CCL244CONTROL1	CCL244R1	OK	25.116	9.0056	-1.47971	-2.25748	0.0236	0.942621	no
ENST00000297258	ENSG00000164687	FABP5	8:82190107-82197012	CCL244CONTROL1	CCL244R1	OK	7.35483	27.7191	1.91412	2.82223	0.0059	0.942621	no
ENST00000298832	ENSG00000119685	TTLL5	14:76041230-76550928	CCL244CONTROL1	CCL244R1	OK	1.11991	0.000236369	-12.2101	-0.0877351	0.01655	0.942621	no
ENST00000299204	ENSG00000166170	BAG5	14:104019757-104181841	CCL244CONTROL1	CCL244R1	OK	2.54441	0.000234095	-13.408	-0.0699543	0.01135	0.942621	no
ENST00000301263	ENSG00000167656	LY6D	8:143866295-143893536	CCL244CONTROL1	CCL244R1	OK	45.6691	2.58973	-4.14034	-5.14614	0.00055	0.768663	no
ENST00000301732	ENSG00000167972	ABCA3	16:2325881-2476700	CCL244CONTROL1	CCL244R1	OK	1.03478	0.000285416	-11.824	-0.146686	0.02095	0.942621	no
ENST00000302262	ENSG00000171298	GAA	17:78075354-78093678	CCL244CONTROL1	CCL244R1	OK	0.000352032	3.23764	13.1669	0.107672	0.01125	0.942621	no
ENST00000303155	ENSG00000171208	NETO2	16:47111613-47177908	CCL244CONTROL1	CCL244R1	OK	0.325161	2.45979	2.91931	2.69404	0.03545	0.942621	no
ENST00000303383	ENSG00000171241	SHCBP1	16:46614465-46655538	CCL244CONTROL1	CCL244R1	OK	1.15417	3.63404	1.65472	2.16378	0.0355	0.942621	no
ENST00000303806	ENSG00000196331	HIST1H2BO	6:27861202-27861669	CCL244CONTROL1	CCL244R1	OK	531.613	4399.5	3.04889	3.70278	0.0013	0.942621	no
ENST00000303910	ENSG00000168274	HIST1H2AE	6:26217164-26217711	CCL244CONTROL1	CCL244R1	OK	109.683	1067.53	3.28287	5.05206	5e-05	0.122986	no
ENST00000304218	ENSG00000168298	HIST1H1E	6:26156558-26157343	CCL244CONTROL1	CCL244R1	OK	345.72	1910.34	2.46615	2.98807	0.00845	0.942621	no
ENST00000305366	ENSG00000169908	TM4SF1	3:149086808-149104370	CCL244CONTROL1	CCL244R1	OK	73.7911	18.9197	-1.96356	-2.80519	0.00675	0.942621	no
ENST00000306688	ENSG00000169683	LRRC45	17:79976577-79989027	CCL244CONTROL1	CCL244R1	OK	1.85078	7.99869	2.11163	2.20869	0.03125	0.942621	no
ENST00000307296	ENSG00000170248	PDCD6IP	3:33835043-33911194	CCL244CONTROL1	CCL244R1	OK	2.27062	0.000774173	-11.5181	-0.254854	0.04385	0.942621	no
ENST00000307422	ENSG00000105364	MRPL4	19:10362576-10399695	CCL244CONTROL1	CCL244R1	OK	0.000750327	9.89638	13.6871	0.0778934	0.016	0.942621	no
ENST00000307662	ENSG00000171992	SYNPO	5:149980641-150038782	CCL244CONTROL1	CCL244R1	OK	3.11143	0.409711	-2.9249	-3.13639	0.01425	0.942621	no
ENST00000308302	ENSG00000174567	GOLT1A	1:204167287-204183220	CCL244CONTROL1	CCL244R1	OK	19.4681	6.57181	-1.56675	-2.32132	0.02205	0.942621	no
ENST00000308650	ENSG00000196110	ZNF699	19:9402190-9420514	CCL244CONTROL1	CCL244R1	OK	1.22033	0.00157068	-9.60167	-0.299373	0.0407	0.942621	no
ENST00000309188	ENSG00000173566	NUDT18	8:21964382-21966932	CCL244CONTROL1	CCL244R1	OK	0.00182645	5.91895	11.6621	0.190599	0.02275	0.942621	no
ENST00000309964	ENSG00000134852	CLOCK	4:56262079-56414056	CCL244CONTROL1	CCL244R1	OK	18.5251	4.05888	-2.19033	-2.15073	0.0437	0.942621	no
ENST00000310092	ENSG00000173933	RBM4	11:66384052-66448988	CCL244CONTROL1	CCL244R1	OK	10.2284	0.000466572	-14.4201	-0.0681021	0.0072	0.942621	no
ENST00000310942	ENSG00000173894	CBX2	17:77751930-77761782	CCL244CONTROL1	CCL244R1	OK	0.89637	5.08644	2.50449	3.57194	0.001	0.942621	no
ENST00000310974	ENSG00000173852	DPY19L1	7:34968487-35225934	CCL244CONTROL1	CCL244R1	OK	2.04145	5.70133	1.48171	2.02213	0.0354	0.942621	no
ENST00000311075	ENSG00000173702	MUC13	3:124624288-124672663	CCL244CONTROL1	CCL244R1	OK	3.3407	0.697668	-2.25954	-2.72292	0.01725	0.942621	no
ENST00000311189	ENSG00000174775	HRAS	11:532241-537287	CCL244CONTROL1	CCL244R1	OK	7.45063	28.6776	1.94449	2.16846	0.04025	0.942621	no
ENST00000311417	ENSG00000172667	ZMAT3	3:178735010-178790067	CCL244CONTROL1	CCL244R1	OK	5.19755	2.18543	-1.24992	-2.09517	0.03445	0.942621	no
ENST00000311943	ENSG00000092108	SCFD1	14:31091317-31291908	CCL244CONTROL1	CCL244R1	OK	0.000775938	1.67209	11.0734	0.105733	0.0177	0.942621	no
ENST00000312584	ENSG00000173530	TNFRSF10D	8:22993100-23021543	CCL244CONTROL1	CCL244R1	OK	29.4415	10.1781	-1.53238	-2.64907	0.01045	0.942621	no
ENST00000312858	ENSG00000089916	GPATCH2L	14:76618258-76731228	CCL244CONTROL1	CCL244R1	OK	0.000857461	1.71811	10.9685	0.142652	0.0272	0.942621	no
ENST00000313655	ENSG00000136982	DSCC1	8:120846215-120868250	CCL244CONTROL1	CCL244R1	OK	1.79124	10.0069	2.48196	3.62482	0.00265	0.942621	no
ENST00000314980	ENSG00000178934	LGALS7B	19:39279850-39282389	CCL244CONTROL1	CCL244R1	OK	12.2226	3.08246	-1.9874	-2.22544	0.04545	0.942621	no
ENST00000315251	ENSG00000016391	CHDH	3:53528682-53880417	CCL244CONTROL1	CCL244R1	OK	0.586454	1.73946	1.56855	1.99616	0.04135	0.942621	no
ENST00000317508	ENSG00000052344	PRSS8	16:31142753-31147083	CCL244CONTROL1	CCL244R1	OK	39.1631	12.7339	-1.62082	-2.3991	0.0153	0.942621	no
ENST00000317620	ENSG00000155066	PROM2	2:95940200-95957056	CCL244CONTROL1	CCL244R1	OK	2.15139	0.00107365	-10.9685	-0.361517	0.0406	0.942621	no
ENST00000317811	ENSG00000179431	FJX1	11:35639734-35642419	CCL244CONTROL1	CCL244R1	OK	0.692356	2.46405	1.83145	2.2645	0.03515	0.942621	no
ENST00000318387	ENSG00000122952	ZWINT	10:58116988-58121036	CCL244CONTROL1	CCL244R1	OK	0.00194388	7.39968	11.8943	0.196676	0.02385	0.942621	no
ENST00000318948	ENSG00000180530	NRIP1	21:16333555-16437321	CCL244CONTROL1	CCL244R1	OK	10.1915	4.30912	-1.2419	-1.92757	0.04935	0.942621	no
ENST00000319264	ENSG00000153714	LURAP1L	9:12685438-12822130	CCL244CONTROL1	CCL244R1	OK	14.734	3.999	-1.88143	-2.89016	0.00425	0.942621	no
ENST00000319481	ENSG00000141447	OSBPL1A	18:21718941-21977844	CCL244CONTROL1	CCL244R1	OK	0.46137	3.06753	2.73308	1.6666	0.0147	0.942621	no
ENST00000320316	ENSG00000040633	PHF23	17:7138346-7143041	CCL244CONTROL1	CCL244R1	OK	1.82134	0.00215978	-9.7199	-0.261156	0.0429	0.942621	no
ENST00000320387	ENSG00000181201	HIST3H2BA	1:228651803-228652327	CCL244CONTROL1	CCL244R1	OK	0	1.92265	1.54727707050638	NA	0.0302	0.942621	no
ENST00000320743	ENSG00000139263	LRIG3	12:59265930-59314303	CCL244CONTROL1	CCL244R1	OK	0.652066	2.32142	1.83192	2.34878	0.02675	0.942621	no
ENST00000320756	ENSG00000111196	MAGOHB	12:10758611-10766222	CCL244CONTROL1	CCL244R1	OK	4.2434	16.377	1.94838	2.11547	0.05	0.942621	no
ENST00000322122	ENSG00000177238	TRIM72	16:31225341-31236510	CCL244CONTROL1	CCL244R1	OK	0.278103	2.75399	3.30783	3.32641	0.0255	0.942621	no
ENST00000322914	ENSG00000141524	TMC6	17:76000248-76139049	CCL244CONTROL1	CCL244R1	OK	2.59099	0.000885076	-11.5154	-0.126325	0.0212	0.942621	no
ENST00000324460	ENSG00000044574	HSPA5	9:127997131-128003609	CCL244CONTROL1	CCL244R1	OK	194.506	45.6226	-2.09199	-2.7492	0.0137	0.942621	no
ENST00000326587	ENSG00000179222	MAGED1	X:51546102-51645453	CCL244CONTROL1	CCL244R1	OK	23.8872	7.9567	-1.58599	-2.18787	0.03275	0.942621	no
ENST00000326840	ENSG00000057019	DCBLD2	3:98432740-98620533	CCL244CONTROL1	CCL244R1	OK	2.37748	9.58638	2.01155	3.0864	0.003	0.942621	no
ENST00000327423	ENSG00000183530	PRR14L	22:32072241-32146126	CCL244CONTROL1	CCL244R1	OK	4.39033	1.33502	-1.71747	-2.30731	0.03015	0.942621	no
ENST00000328488	ENSG00000182572	HIST1H3I	6:27839622-27840099	CCL244CONTROL1	CCL244R1	OK	157.979	760.972	2.26811	3.69125	0.00125	0.942621	no
ENST00000328736	ENSG00000070778	PTPN21	14:88851267-89021077	CCL244CONTROL1	CCL244R1	OK	1.29436	0.000339527	-11.8964	-0.161315	0.018	0.942621	no
ENST00000329099	ENSG00000183688	FAM101B	17:289768-295730	CCL244CONTROL1	CCL244R1	OK	0.158591	1.77335	3.4831	3.53752	0.01835	0.942621	no
ENST00000329399	ENSG00000107438	PDLIM1	10:96997328-97050781	CCL244CONTROL1	CCL244R1	OK	45.172	17.759	-1.34688	-2.17932	0.0296	0.942621	no
ENST00000330180	ENSG00000184348	HIST1H2AK	6:27805657-27806117	CCL244CONTROL1	CCL244R1	OK	86.1794	956.147	3.47182	5.56019	5e-05	0.122986	no
ENST00000330871	ENSG00000184557	SOCS3	17:76352863-76356158	CCL244CONTROL1	CCL244R1	OK	0.662239	2.74214	2.04988	2.66053	0.01445	0.942621	no
ENST00000331128	ENSG00000184270	HIST2H2AB	1:149859018-149872351	CCL244CONTROL1	CCL244R1	OK	111.448	1048.56	3.23397	4.9954	5e-05	0.122986	no
ENST00000331380	ENSG00000184260	HIST2H2AC	1:149858524-149858961	CCL244CONTROL1	CCL244R1	OK	594.093	2717.2	2.19336	3.02121	0.005	0.942621	no
ENST00000331442	ENSG00000184357	HIST1H1B	6:27834569-27835359	CCL244CONTROL1	CCL244R1	OK	350.056	4485.54	3.67962	3.5105	0.00785	0.942621	no
ENST00000331491	ENSG00000183598	HIST2H3D	1:149784825-149785236	CCL244CONTROL1	CCL244R1	OK	17.5838	258.568	3.87823	5.85453	5e-05	0.122986	no
ENST00000331569	ENSG00000183779	ZNF703	8:37553268-37557537	CCL244CONTROL1	CCL244R1	OK	7.52956	3.08463	-1.28747	-2.12214	0.0363	0.942621	no
ENST00000332499	ENSG00000186834	HEXIM1	17:43222900-43248951	CCL244CONTROL1	CCL244R1	OK	11.6883	3.77995	-1.62862	-2.06426	0.03995	0.942621	no
ENST00000333047	ENSG00000164109	MAD2L1	4:120976762-121337921	CCL244CONTROL1	CCL244R1	OK	7.77435	29.3211	1.91514	2.08211	0.0481	0.942621	no
ENST00000333151	ENSG00000182611	HIST1H2AJ	6:27782111-27782607	CCL244CONTROL1	CCL244R1	OK	171.954	1831.93	3.41327	4.93086	0.00015	0.341628	no
ENST00000333256	ENSG00000184281	TSSC4	11:2419370-2425106	CCL244CONTROL1	CCL244R1	OK	0.00202972	3.18817	10.6172	0.216872	0.04905	0.942621	no
ENST00000333430	ENSG00000180739	S1PR5	19:10623622-10628607	CCL244CONTROL1	CCL244R1	OK	0.311164	3.76177	3.59566	3.70397	0.01875	0.942621	no
ENST00000333646	ENSG00000184634	MED12	X:70338405-70362303	CCL244CONTROL1	CCL244R1	OK	0.393259	2.48178	2.65782	2.2857	0.0316	0.942621	no
ENST00000334047	ENSG00000117525	F3	1:94994780-95007356	CCL244CONTROL1	CCL244R1	OK	5.56059	0.893739	-2.63731	-2.57327	0.02255	0.942621	no
ENST00000335272	ENSG00000180957	PITPNB	22:28247656-29075853	CCL244CONTROL1	CCL244R1	OK	0.00182893	2.85343	10.6075	0.253478	0.04285	0.942621	no
ENST00000335727	ENSG00000100354	TNRC6B	22:40440820-40731812	CCL244CONTROL1	CCL244R1	OK	2.75618	0.436006	-2.66025	-2.44864	0.03835	0.942621	no
ENST00000336349	ENSG00000179119	SPTY2D1	11:18610328-18656338	CCL244CONTROL1	CCL244R1	OK	6.31286	2.47224	-1.35248	-2.07472	0.0418	0.942621	no
ENST00000337352	ENSG00000127084	FGD3	9:95709732-95798518	CCL244CONTROL1	CCL244R1	OK	8.55955	2.28858	-1.90308	-2.8243	0.00555	0.942621	no
ENST00000338086	ENSG00000055917	PUM2	2:20448451-20551995	CCL244CONTROL1	CCL244R1	OK	3.30585	0.000127022	-14.6677	-0.0747021	0.0074	0.942621	no
ENST00000338370	ENSG00000175756	AURKAIP1	1:1309109-1310875	CCL244CONTROL1	CCL244R1	OK	4.47499	0.000660363	-12.7263	-0.0496031	0.01315	0.942621	no
ENST00000338379	ENSG00000187475	HIST1H1T	6:26107639-26108364	CCL244CONTROL1	CCL244R1	OK	0	5.96219	2.79954118612673	NA	5e-05	0.122986	no
ENST00000338591	ENSG00000187961	KLHL17	1:895966-901095	CCL244CONTROL1	CCL244R1	OK	0.929584	3.5504	1.93332	2.41452	0.02095	0.942621	no
ENST00000339276	ENSG00000175793	SFN	1:27189632-27190947	CCL244CONTROL1	CCL244R1	OK	207.565	63.6596	-1.70512	-2.75188	0.00835	0.942621	no
ENST00000339773	ENSG00000135622	SEMA4F	2:74881354-74910981	CCL244CONTROL1	CCL244R1	OK	0.481711	2.23954	2.21697	1.27981	0.02955	0.942621	no
ENST00000339812	ENSG00000124635	HIST1H2BJ	6:27093675-27100541	CCL244CONTROL1	CCL244R1	OK	1133.6	9071.37	3.00041	3.11146	0.0051	0.942621	no
ENST00000340756	ENSG00000188987	HIST1H4D	6:26188937-26189304	CCL244CONTROL1	CCL244R1	OK	1142.09	8903.72	2.96273	3.28064	0.00865	0.942621	no
ENST00000341084	ENSG00000034677	RNF19A	8:101170133-101348446	CCL244CONTROL1	CCL244R1	OK	2.23251	0.000465721	-12.2269	-0.157729	0.01985	0.942621	no
ENST00000341771	ENSG00000070759	TESK2	1:45794834-45956872	CCL244CONTROL1	CCL244R1	OK	0.00182623	1.71759	9.87731	0.24109	0.0416	0.942621	no
ENST00000341845	ENSG00000157107	FCHO2	5:72251807-72386349	CCL244CONTROL1	CCL244R1	OK	0.000292679	1.5569	12.3771	0.117423	0.01155	0.942621	no
ENST00000341865	ENSG00000188112	C6orf132	6:42068855-42110415	CCL244CONTROL1	CCL244R1	OK	3.64913	0.901519	-2.01713	-2.65903	0.00725	0.942621	no
ENST00000342624	ENSG00000125247	TMTC4	13:101256180-101327347	CCL244CONTROL1	CCL244R1	OK	1.19358	6.12637	2.35974	2.6837	0.0168	0.942621	no
ENST00000342697	ENSG00000164938	TP53INP1	8:95825538-96128683	CCL244CONTROL1	CCL244R1	OK	1.75971	0.000465091	-11.8855	-0.144138	0.0284	0.942621	no
ENST00000343380	ENSG00000101412	E2F1	20:32263488-32274210	CCL244CONTROL1	CCL244R1	OK	1.964	12.1212	2.62566	4.08528	0.00025	0.495911	no
ENST00000343677	ENSG00000187837	HIST1H1C	6:26055967-26056699	CCL244CONTROL1	CCL244R1	OK	554.692	3681.73	2.73062	2.47641	0.0445	0.942621	no
ENST00000344517	ENSG00000135776	ABCB10	1:229652328-229694442	CCL244CONTROL1	CCL244R1	OK	2.25693	5.67302	1.32975	2.11548	0.035	0.942621	no
ENST00000345724	ENSG00000172175	MALT1	18:56337589-56421709	CCL244CONTROL1	CCL244R1	OK	1.35814	6.20084	2.19083	2.24257	0.0282	0.942621	no
ENST00000346128	ENSG00000104067	TJP1	15:29991570-30261068	CCL244CONTROL1	CCL244R1	OK	2.34636	6.38347e-05	-15.1657	-0.0508879	0.00665	0.942621	no
ENST00000347067	ENSG00000184990	SIVA1	14:105219436-105234831	CCL244CONTROL1	CCL244R1	OK	13.8334	0.00192952	-12.8076	-0.0583449	0.006	0.942621	no
ENST00000347615	ENSG00000116698	SMG7	1:183430008-183567381	CCL244CONTROL1	CCL244R1	OK	1.11772	0.000265823	-12.0378	-0.121264	0.01585	0.942621	no
ENST00000348075	ENSG00000105426	PTPRS	19:5158505-5340814	CCL244CONTROL1	CCL244R1	OK	2.45755	0.492391	-2.31935	-1.35788	0.0497	0.942621	no
ENST00000348624	ENSG00000242802	AP5Z1	7:4815252-4833943	CCL244CONTROL1	CCL244R1	OK	2.19214	0.00143979	-10.5723	-0.278671	0.0313	0.942621	no
ENST00000348655	ENSG00000185507	IRF7	11:612552-615999	CCL244CONTROL1	CCL244R1	OK	2.52817	0.000709457	-11.7991	-0.090807	0.01445	0.942621	no
ENST00000349155	ENSG00000135111	TBX3	12:115108058-115121969	CCL244CONTROL1	CCL244R1	OK	26.0006	7.46577	-1.80018	-2.55133	0.0149	0.942621	no
ENST00000350026	ENSG00000049618	ARID1B	6:157099062-157531913	CCL244CONTROL1	CCL244R1	OK	0.0872128	1.24616	3.83681	2.2663	0.0379	0.942621	no
ENST00000350051	ENSG00000089685	BIRC5	17:76210266-76221717	CCL244CONTROL1	CCL244R1	OK	7.00584	21.6128	1.62525	2.07023	0.03435	0.942621	no
ENST00000351933	ENSG00000100105	PATZ1	22:31677578-31742218	CCL244CONTROL1	CCL244R1	OK	0.000434462	3.73426	13.0693	0.132361	0.014	0.942621	no
ENST00000351937	ENSG00000146063	TRIM41	5:180649498-180662809	CCL244CONTROL1	CCL244R1	OK	1.95078	0.000257047	-12.8897	-0.0560605	0.0071	0.942621	no
ENST00000352251	ENSG00000120685	PROSER1	13:39584002-39612252	CCL244CONTROL1	CCL244R1	OK	1.19581	0.000429563	-11.4428	-0.165597	0.01975	0.942621	no
ENST00000352967	ENSG00000143498	TAF1A	1:222731243-222766590	CCL244CONTROL1	CCL244R1	OK	0.282286	2.3097	3.03248	1.70547	0.032	0.942621	no
ENST00000353234	ENSG00000165138	ANKS6	9:101493610-101559247	CCL244CONTROL1	CCL244R1	OK	0.315698	3.73772	3.56554	2.44985	0.04645	0.942621	no
ENST00000353479	ENSG00000065618	COL17A1	10:105791043-105845760	CCL244CONTROL1	CCL244R1	OK	12.114	3.03845	-1.99527	-3.21789	0.0016	0.942621	no
ENST00000354115	ENSG00000136689	IL1RN	2:113864790-113891593	CCL244CONTROL1	CCL244R1	OK	5.8073	1.35143	-2.10339	-2.54319	0.01935	0.942621	no
ENST00000354179	ENSG00000165671	NSD1	5:176560025-176727216	CCL244CONTROL1	CCL244R1	OK	1.39496	0.000455359	-11.5809	-0.303326	0.04425	0.942621	no
ENST00000354200	ENSG00000125875	TBC1D20	20:416123-443197	CCL244CONTROL1	CCL244R1	OK	1.03716	0.00037096	-11.4491	-0.122857	0.01585	0.942621	no
ENST00000354348	ENSG00000198339	HIST1H4I	6:27106072-27114619	CCL244CONTROL1	CCL244R1	OK	60.15	791.324	3.71763	3.66661	0.0013	0.942621	no
ENST00000354675	ENSG00000131016	AKAP12	6:151561133-151679692	CCL244CONTROL1	CCL244R1	OK	2.10291	8.19768	1.96282	2.61295	0.01	0.942621	no
ENST00000354944	ENSG00000104419	NDRG1	8:134249413-134314265	CCL244CONTROL1	CCL244R1	OK	35.7515	4.95135	-2.85211	-2.41246	0.02875	0.942621	no
ENST00000355057	ENSG00000197238	HIST1H4J	6:27791883-27792257	CCL244CONTROL1	CCL244R1	OK	378.052	2048.12	2.43764	3.7406	0.0008	0.942621	no
ENST00000355237	ENSG00000197822	OCLN	5:68773298-69006341	CCL244CONTROL1	CCL244R1	OK	6.67224	1.71963	-1.95607	-2.03516	0.03535	0.942621	no
ENST00000355315	ENSG00000170791	CHCHD7	8:57124244-57131357	CCL244CONTROL1	CCL244R1	OK	0.00157879	1.22322	9.59765	0.137019	0.0328	0.942621	no
ENST00000355528	ENSG00000141556	TBCD	17:80709939-81009686	CCL244CONTROL1	CCL244R1	OK	4.92516	0.000464377	-13.3726	-0.115942	0.0202	0.942621	no
ENST00000355585	ENSG00000078269	SYNJ2	6:158402887-158520208	CCL244CONTROL1	CCL244R1	OK	2.51922	0.000504291	-12.2864	-0.301613	0.0371	0.942621	no
ENST00000355621	ENSG00000186591	UBE2H	7:129470571-129592789	CCL244CONTROL1	CCL244R1	OK	12.8083	5.25806	-1.28448	-2.01612	0.04505	0.942621	no
ENST00000355836	ENSG00000197451	HNRNPAB	5:177631507-177659823	CCL244CONTROL1	CCL244R1	OK	6.58173	0.00037846	-14.086	-0.0506337	0.00465	0.942621	no
ENST00000355981	ENSG00000198558	HIST1H4L	6:27840925-27841289	CCL244CONTROL1	CCL244R1	OK	291.166	3097.81	3.41134	4.88679	0.00025	0.495911	no
ENST00000356082	ENSG00000196878	LAMB3	1:209788214-209825811	CCL244CONTROL1	CCL244R1	OK	31.3514	9.48376	-1.725	-2.49739	0.01385	0.942621	no
ENST00000356350	ENSG00000197459	HIST1H2BH	6:26251837-26253284	CCL244CONTROL1	CCL244R1	OK	139.151	1124.82	3.01498	4.53923	5e-05	0.122986	no
ENST00000356476	ENSG00000197409	HIST1H3D	6:26197067-26199521	CCL244CONTROL1	CCL244R1	OK	342.288	5175.62	3.91845	2.59871	0.03145	0.942621	no
ENST00000356509	ENSG00000112312	GMNN	6:24775158-24786327	CCL244CONTROL1	CCL244R1	OK	0.00323593	8.35011	11.3334	0.231624	0.02525	0.942621	no
ENST00000356530	ENSG00000197697	HIST1H2BE	6:26183957-26184454	CCL244CONTROL1	CCL244R1	OK	99.6769	1180.93	3.56652	5.51165	5e-05	0.122986	no
ENST00000356714	ENSG00000106268	NUDT1	7:2281856-2290781	CCL244CONTROL1	CCL244R1	OK	9.9473	29.6936	1.57777	2.0933	0.0374	0.942621	no
ENST00000356716	ENSG00000085274	MYNN	3:169490618-169507504	CCL244CONTROL1	CCL244R1	OK	1.32632	0.000404341	-11.6796	-0.0842939	0.00995	0.942621	no
ENST00000357156	ENSG00000125971	DYNLRB1	20:33104188-33128762	CCL244CONTROL1	CCL244R1	OK	51.0123	18.4	-1.47114	-2.29529	0.02185	0.942621	no
ENST00000357227	ENSG00000102225	CDK16	X:47077258-47089396	CCL244CONTROL1	CCL244R1	OK	0.00157465	2.05265	10.3482	0.229915	0.0409	0.942621	no
ENST00000357320	ENSG00000198374	HIST1H2AL	6:27833033-27833606	CCL244CONTROL1	CCL244R1	OK	63.179	666.323	3.39871	5.43532	5e-05	0.122986	no
ENST00000357549	ENSG00000197914	HIST1H4K	6:27798951-27799305	CCL244CONTROL1	CCL244R1	OK	34.3367	188.359	2.45566	3.86654	0.0003	0.527083	no
ENST00000357631	ENSG00000172731	LRRC20	10:72058725-72142406	CCL244CONTROL1	CCL244R1	OK	1.36717	0.00145282	-9.87812	-0.263215	0.0319	0.942621	no
ENST00000357647	ENSG00000198366	HIST1H3A	6:26020717-26021186	CCL244CONTROL1	CCL244R1	OK	200.626	2418.8	3.59171	5.05568	5e-05	0.122986	no
ENST00000357668	ENSG00000153317	ASAP1	8:131064352-131455971	CCL244CONTROL1	CCL244R1	OK	1.15142	0.000378171	-11.5721	-0.173379	0.0198	0.942621	no
ENST00000357898	ENSG00000171621	SPSB1	1:9352938-9429591	CCL244CONTROL1	CCL244R1	OK	1.55973	0.00301148	-9.01661	-0.227805	0.03945	0.942621	no
ENST00000358321	ENSG00000099994	SUSD2	22:24577226-24585078	CCL244CONTROL1	CCL244R1	OK	4.82415	0.906879	-2.41129	-3.15233	0.0035	0.942621	no
ENST00000358378	ENSG00000215182	MUC5AC	11:1212759-1222364	CCL244CONTROL1	CCL244R1	OK	1.61835	0.298617	-2.43816	-2.93571	0.01375	0.942621	no
ENST00000358383	ENSG00000185480	PARPBP	12:102513955-102591623	CCL244CONTROL1	CCL244R1	OK	0.0016647	3.7807	11.1492	0.237209	0.029	0.942621	no
ENST00000358731	ENSG00000145734	BDP1	5:70751441-70863649	CCL244CONTROL1	CCL244R1	OK	2.0465	0.200057	-3.35467	-2.25377	0.0482	0.942621	no
ENST00000358739	ENSG00000196747	HIST1H2AI	6:27775898-27776429	CCL244CONTROL1	CCL244R1	OK	210.07	1951.92	3.21595	4.49918	0.0005	0.749915	no
ENST00000359193	ENSG00000196787	HIST1H2AG	6:27100831-27103070	CCL244CONTROL1	CCL244R1	OK	138.822	1116.46	3.00763	2.88231	0.0236	0.942621	no
ENST00000359208	ENSG00000067334	DNTTIP2	1:94333372-94345474	CCL244CONTROL1	CCL244R1	OK	0.00138963	1.66481	10.2264	0.192502	0.0282	0.942621	no
ENST00000359276	ENSG00000047230	CTPS2	X:16606125-16731059	CCL244CONTROL1	CCL244R1	OK	0.287403	2.47877	3.10847	2.6208	0.0458	0.942621	no
ENST00000359465	ENSG00000196374	HIST1H2BM	6:27782821-27783267	CCL244CONTROL1	CCL244R1	OK	61.9841	582.891	3.23326	5.33993	5e-05	0.122986	no
ENST00000359470	ENSG00000182795	C1orf116	1:207191745-207206101	CCL244CONTROL1	CCL244R1	OK	15.2121	2.20175	-2.7885	-4.28692	5e-05	0.122986	no
ENST00000359524	ENSG00000124813	RUNX2	6:44777053-45634483	CCL244CONTROL1	CCL244R1	OK	1.52154	0.118456	-3.68311	-2.08693	0.03555	0.942621	no
ENST00000359568	ENSG00000160299	PCNT	21:47744035-47865682	CCL244CONTROL1	CCL244R1	OK	0.903937	2.90826	1.68586	1.98944	0.04915	0.942621	no
ENST00000359659	ENSG00000197575	RPS17P2	5:116051928-116052387	CCL244CONTROL1	CCL244R1	OK	0	1.34811	1.23149999479263	NA	0.03125	0.942621	no
ENST00000359741	ENSG00000104635	SLC39A14	8:22224761-22291642	CCL244CONTROL1	CCL244R1	OK	3.7028	0.000555941	-12.7014	-0.122767	0.0294	0.942621	no
ENST00000359907	ENSG00000196176	HIST1H4A	6:26021906-26022278	CCL244CONTROL1	CCL244R1	OK	149.647	2883.49	4.26818	6.2688	5e-05	0.122986	no
ENST00000359980	ENSG00000155256	ZFYVE27	10:99496877-99520664	CCL244CONTROL1	CCL244R1	OK	2.52984	0.00059059	-12.0646	-0.135108	0.01795	0.942621	no
ENST00000359985	ENSG00000197846	HIST1H2BF	6:26199747-26200942	CCL244CONTROL1	CCL244R1	OK	42.8404	416.601	3.28162	4.98502	5e-05	0.122986	no
ENST00000360270	ENSG00000147065	MSN	X:64808256-64961791	CCL244CONTROL1	CCL244R1	OK	0.109845	2.29131	4.38262	3.93279	0.0473	0.942621	no
ENST00000360408	ENSG00000196966	HIST1H3E	6:26225382-26225844	CCL244CONTROL1	CCL244R1	OK	23.8704	62.6309	1.39165	2.17111	0.0369	0.942621	no
ENST00000360441	ENSG00000198518	HIST1H4E	6:26204857-26206266	CCL244CONTROL1	CCL244R1	OK	161.996	965.638	2.57552	3.09027	0.00505	0.942621	no
ENST00000360448	ENSG00000164674	SYTL3	6:159071045-159185908	CCL244CONTROL1	CCL244R1	OK	0.682318	2.77562	2.0243	2.32414	0.03775	0.942621	no
ENST00000360472	ENSG00000162734	PEA15	1:160171988-160185166	CCL244CONTROL1	CCL244R1	OK	12.3696	4.14425	-1.57761	-2.15792	0.0311	0.942621	no
ENST00000361052	ENSG00000196188	CTSE	1:206317458-206332104	CCL244CONTROL1	CCL244R1	OK	1.15775	0.00110749	-10.0298	-0.153776	0.03725	0.942621	no
ENST00000361069	ENSG00000050555	LAMC3	9:133884468-133969860	CCL244CONTROL1	CCL244R1	OK	1.3527	0.362409	-1.90015	-2.1635	0.03495	0.942621	no
ENST00000361148	ENSG00000122952	ZWINT	10:58116988-58121036	CCL244CONTROL1	CCL244R1	OK	8.13106	31.1787	1.93904	1.94918	0.04865	0.942621	no
ENST00000361298	ENSG00000166681	NGFRAP1	X:102631267-102633005	CCL244CONTROL1	CCL244R1	OK	9.33941	0.00430956	-11.0816	-0.232901	0.02905	0.942621	no
ENST00000361475	ENSG00000198959	TGM2	20:36756862-36794980	CCL244CONTROL1	CCL244R1	OK	10.5904	0.791821	-3.74144	-3.19475	0.0223	0.942621	no
ENST00000361548	ENSG00000158055	GRHL3	1:24620476-24799466	CCL244CONTROL1	CCL244R1	OK	13.1698	0.851324	-3.95138	-2.6201	0.0407	0.942621	no
ENST00000361660	ENSG00000198874	TYW1	7:66452663-66704501	CCL244CONTROL1	CCL244R1	OK	1.31164	0.000962069	-10.4129	-0.207416	0.032	0.942621	no
ENST00000361729	ENSG00000007968	E2F2	1:23832921-23857712	CCL244CONTROL1	CCL244R1	OK	0.495186	4.21497	3.08948	4.21065	0.00055	0.768663	no
ENST00000361901	ENSG00000122786	CALD1	7:134429002-134655479	CCL244CONTROL1	CCL244R1	OK	2.88843	0.560402	-2.36575	-2.484	0.0212	0.942621	no
ENST00000362012	ENSG00000095303	PTGS1	9:125132823-125157982	CCL244CONTROL1	CCL244R1	OK	2.51001	0.676155	-1.89227	-2.47872	0.0181	0.942621	no
ENST00000362020	ENSG00000126709	IFI6	1:27992571-27998729	CCL244CONTROL1	CCL244R1	OK	13.1993	0.00160437	-13.0062	-0.0886195	0.0088	0.942621	no
ENST00000363022	ENSG00000199892	RNU1-17P	5:180156585-180156737	CCL244CONTROL1	CCL244R1	OK	47.3291	0	-5.59482022357341	NA	0.00895	0.942621	no
ENST00000363564	ENSG00000200434	RNA5-8SP2	16:33965425-33965577	CCL244CONTROL1	CCL244R1	OK	120.952	0	-6.93016960815008	NA	0.00035	0.566383	no
ENST00000364102	ENSG00000200972	RNU5A-8P	1:210501595-210849638	CCL244CONTROL1	CCL244R1	OK	2546.37	7490.09	1.55654	2.40751	0.0179	0.942621	no
ENST00000364931	ENSG00000201801	RNU5E-4P	1:11969864-11969984	CCL244CONTROL1	CCL244R1	OK	526.002	1512.25	1.52356	2.11131	0.04425	0.942621	no
ENST00000365494	ENSG00000263934	SNORD3A	17:19091328-19092027	CCL244CONTROL1	CCL244R1	OK	69483.7	2993.34	-4.53685	-4.37022	0.00255	0.942621	no
ENST00000366299	ENSG00000203482	AC061975.7	17:26547061-26547215	CCL244CONTROL1	CCL244R1	OK	40.1705	0	-5.36353906463326	NA	0.01195	0.942621	no
ENST00000366401	ENSG00000132359	RAP1GAP2	17:2680349-2941033	CCL244CONTROL1	CCL244R1	OK	0.285202	2.04261	2.84036	2.48742	0.0387	0.942621	no
ENST00000366508	ENSG00000153207	AHCTF1	1:247002399-247095280	CCL244CONTROL1	CCL244R1	OK	1.49384	0.00011911	-13.6144	-0.0940517	0.008	0.942621	no
ENST00000366654	ENSG00000182118	FAM89A	1:231154703-231175992	CCL244CONTROL1	CCL244R1	OK	2.10945	6.83282	1.69562	2.27593	0.0328	0.942621	no
ENST00000366695	ENSG00000181218	HIST3H2A	1:228645064-228645560	CCL244CONTROL1	CCL244R1	OK	100.631	622.82	2.62974	4.34398	5e-05	0.122986	no
ENST00000366696	ENSG00000168148	HIST3H3	1:228612545-228613026	CCL244CONTROL1	CCL244R1	OK	0	1.24182	1.16467044605931	NA	0.0293	0.942621	no
ENST00000366726	ENSG00000143774	GUK1	1:228327662-228336685	CCL244CONTROL1	CCL244R1	OK	0.00407918	22.1956	12.4097	0.115213	0.02995	0.942621	no
ENST00000366955	ENSG00000117724	CENPF	1:214776537-214837931	CCL244CONTROL1	CCL244R1	OK	2.14587	5.71244	1.41254	2.34147	0.0186	0.942621	no
ENST00000366999	ENSG00000117650	NEK2	1:211836113-211848960	CCL244CONTROL1	CCL244R1	OK	2.72259	8.42479	1.62966	2.06974	0.0404	0.942621	no
ENST00000367001	ENSG00000170385	SLC30A1	1:211732266-211786413	CCL244CONTROL1	CCL244R1	OK	18.6088	5.69265	-1.70882	-2.89347	0.00385	0.942621	no
ENST00000367120	ENSG00000143466	IKBKE	1:206643790-206671061	CCL244CONTROL1	CCL244R1	OK	1.06431	4.25093	1.99786	2.63397	0.01805	0.942621	no
ENST00000367274	ENSG00000077152	UBE2T	1:202300784-202311108	CCL244CONTROL1	CCL244R1	OK	28.3709	73.6395	1.37607	2.35319	0.0187	0.942621	no
ENST00000367342	ENSG00000163362	C1orf106	1:200860175-200884863	CCL244CONTROL1	CCL244R1	OK	13.4813	3.57821	-1.91365	-2.6919	0.009	0.942621	no
ENST00000367411	ENSG00000186625	KATNA1	6:149916008-149970108	CCL244CONTROL1	CCL244R1	OK	1.27299	0.0015054	-9.72386	-0.16802	0.02765	0.942621	no
ENST00000367468	ENSG00000073756	PTGS2	1:186640922-186649559	CCL244CONTROL1	CCL244R1	OK	6.99168	0.669203	-3.38512	-4.60715	5e-05	0.122986	no
ENST00000367558	ENSG00000143333	RGS16	1:182564827-182573543	CCL244CONTROL1	CCL244R1	OK	2.81644	0.934301	-1.59192	-2.11579	0.0392	0.942621	no
ENST00000367651	ENSG00000164442	CITED2	6:139693392-139695757	CCL244CONTROL1	CCL244R1	OK	20.076	4.44393	-2.17556	-3.262	0.00195	0.942621	no
ENST00000367976	ENSG00000118523	CTGF	6:132264795-132398533	CCL244CONTROL1	CCL244R1	OK	16.4103	4.94494	-1.73058	-2.86422	0.0045	0.942621	no
ENST00000368012	ENSG00000143217	PVRL4	1:161040784-161059389	CCL244CONTROL1	CCL244R1	OK	3.12025	0.614397	-2.34442	-2.8747	0.0126	0.942621	no
ENST00000368073	ENSG00000132716	DCAF8	1:160185504-160256138	CCL244CONTROL1	CCL244R1	OK	2.85316	0.000129725	-14.4248	-0.0495623	0.0183	0.942621	no
ENST00000368406	ENSG00000169242	EFNA1	1:155099935-155107333	CCL244CONTROL1	CCL244R1	OK	12.585	3.32718	-1.91934	-2.27449	0.0299	0.942621	no
ENST00000368455	ENSG00000025156	HSF2	6:122720690-122754264	CCL244CONTROL1	CCL244R1	OK	1.98605	5.57804	1.48985	2.16889	0.0371	0.942621	no
ENST00000368498	ENSG00000047932	GOPC	6:117609462-117923691	CCL244CONTROL1	CCL244R1	OK	1.46515	0.000112403	-13.6701	-0.0442831	0.0395	0.942621	no
ENST00000368738	ENSG00000163220	S100A9	1:153330329-153333503	CCL244CONTROL1	CCL244R1	OK	1.12477	0	-1.08730668227716	NA	0.0195	0.942621	no
ENST00000368823	ENSG00000182134	TDRKH	1:151728016-151766878	CCL244CONTROL1	CCL244R1	OK	0.000325664	1.64008	12.2981	0.0692586	0.0155	0.942621	no
ENST00000368874	ENSG00000143393	PI4KB	1:151252499-151300191	CCL244CONTROL1	CCL244R1	OK	1.78062	0.000280376	-12.6327	-0.0896746	0.0132	0.942621	no
ENST00000369103	ENSG00000148908	RGS10	10:121259339-121302220	CCL244CONTROL1	CCL244R1	OK	38.7795	8.68199	-2.1592	-2.50111	0.0217	0.942621	no
ENST00000369131	ENSG00000183605	SFXN4	10:120900278-120925179	CCL244CONTROL1	CCL244R1	OK	2.31682	0.00133404	-10.7621	-0.0906794	0.01905	0.942621	no
ENST00000369155	ENSG00000184678	HIST2H2BE	1:149856009-149858232	CCL244CONTROL1	CCL244R1	OK	60.1662	225.523	1.90625	2.78853	0.0074	0.942621	no
ENST00000369160	ENSG00000196890	HIST3H2BB	1:228645807-228646259	CCL244CONTROL1	CCL244R1	OK	96.4088	667.299	2.7911	4.64104	5e-05	0.122986	no
ENST00000369161	ENSG00000183558	HIST2H2AA3	1:149813504-149814478	CCL244CONTROL1	CCL244R1	OK	6.32216	27.1521	2.10258	3.26368	0.003	0.942621	no
ENST00000369163	ENSG00000203813	HIST1H3H	6:27777841-27778314	CCL244CONTROL1	CCL244R1	OK	792.438	8175.26	3.3669	3.22531	0.017	0.942621	no
ENST00000369167	ENSG00000203814	HIST2H2BF	1:149754226-149783928	CCL244CONTROL1	CCL244R1	OK	145.295	825.856	2.5069	3.83997	0.00035	0.566383	no
ENST00000369409	ENSG00000092621	PHGDH	1:120202420-120286838	CCL244CONTROL1	CCL244R1	OK	38.5109	97.2705	1.33674	2.2195	0.02315	0.942621	no
ENST00000369798	ENSG00000112742	TTK	6:80713603-80752244	CCL244CONTROL1	CCL244R1	OK	2.33537	10.4094	2.15616	3.17926	0.00255	0.942621	no
ENST00000369847	ENSG00000156374	PCGF6	10:105062552-105110891	CCL244CONTROL1	CCL244R1	OK	1.47528	4.82966	1.71093	2.09978	0.04335	0.942621	no
ENST00000370053	ENSG00000197457	STMN3	20:62271057-62286464	CCL244CONTROL1	CCL244R1	OK	0.296911	2.39514	3.01201	2.90665	0.02385	0.942621	no
ENST00000370167	ENSG00000130829	DUSP9	X:152907945-152916781	CCL244CONTROL1	CCL244R1	OK	0.00157898	2.07046	10.3567	0.231528	0.0306	0.942621	no
ENST00000370187	ENSG00000166167	BTRC	10:103113819-103317078	CCL244CONTROL1	CCL244R1	OK	6.83374e-05	1.4169	14.3397	0.0014895	0.01475	0.942621	no
ENST00000370278	ENSG00000221867	MAGEA3	X:151934651-151938240	CCL244CONTROL1	CCL244R1	OK	0	2.84549	1.94316744097761	NA	5e-05	0.122986	no
ENST00000370570	ENSG00000168216	LMBRD1	6:70385693-70507003	CCL244CONTROL1	CCL244R1	OK	0.000534896	2.67301	12.2869	0.0845825	0.00975	0.942621	no
ENST00000370649	ENSG00000249967	PI4K2A	10:99344079-99436191	CCL244CONTROL1	CCL244R1	OK	1.82114	0.000655411	-11.4402	-0.0837256	0.01165	0.942621	no
ENST00000370794	ENSG00000077254	USP33	1:78161671-78225537	CCL244CONTROL1	CCL244R1	OK	0.000211265	2.95604	13.7723	0.0814257	0.0102	0.942621	no
ENST00000371021	ENSG00000165879	FRAT1	10:99079021-99081672	CCL244CONTROL1	CCL244R1	OK	0.664313	2.19285	1.72287	2.18934	0.03555	0.942621	no
ENST00000371103	ENSG00000196233	LCOR	10:98592016-98740800	CCL244CONTROL1	CCL244R1	OK	3.68665	0.000486376	-12.888	-0.196969	0.0182	0.942621	no
ENST00000371225	ENSG00000184292	TACSTD2	1:59041098-59043166	CCL244CONTROL1	CCL244R1	OK	50.3745	5.57026	-3.17688	-5.22931	5e-05	0.122986	no
ENST00000371356	ENSG00000087586	AURKA	20:54944444-54967393	CCL244CONTROL1	CCL244R1	OK	0.00185805	3.64841	10.9393	0.263308	0.0302	0.942621	no
ENST00000371474	ENSG00000165802	NSMF	9:140342021-140353786	CCL244CONTROL1	CCL244R1	OK	5.57236	0.000528239	-13.3648	-0.16135	0.01705	0.942621	no
ENST00000371502	ENSG00000138119	MYOF	10:95066185-95242074	CCL244CONTROL1	CCL244R1	OK	5.68477	0.000602412	-13.2041	-0.252198	0.0347	0.942621	no
ENST00000371656	ENSG00000240849	TMEM189	20:48695414-48770335	CCL244CONTROL1	CCL244R1	OK	2.80623	0.00212573	-10.3665	-0.187164	0.0343	0.942621	no
ENST00000371697	ENSG00000148677	ANKRD1	10:92671852-92681033	CCL244CONTROL1	CCL244R1	OK	37.5369	4.09447	-3.19656	-5.09545	5e-05	0.122986	no
ENST00000371740	ENSG00000112759	SLC29A1	6:44187241-44201888	CCL244CONTROL1	CCL244R1	OK	0.000967201	4.16488	12.0722	0.159772	0.0138	0.942621	no
ENST00000371877	ENSG00000123473	STIL	1:47715810-47779819	CCL244CONTROL1	CCL244R1	OK	0.000633819	1.11977	10.7868	0.222924	0.0257	0.942621	no
ENST00000372232	ENSG00000101844	ATG4A	X:107334897-107682727	CCL244CONTROL1	CCL244R1	OK	1.18303	0.00246636	-8.90589	-0.31478	0.041	0.942621	no
ENST00000372677	ENSG00000133134	BEX2	X:102564273-102565974	CCL244CONTROL1	CCL244R1	OK	0	2.23681	1.69457268216656	NA	5e-05	0.122986	no
ENST00000373713	ENSG00000121769	FABP3	1:31838471-31849697	CCL244CONTROL1	CCL244R1	OK	31.8763	6.93786	-2.19992	-2.9662	0.00775	0.942621	no
ENST00000373803	ENSG00000101079	NDRG3	20:35280168-35374541	CCL244CONTROL1	CCL244R1	OK	0.000976724	1.34435	10.4267	0.191764	0.0291	0.942621	no
ENST00000374045	ENSG00000181634	TNFSF15	9:117546914-117568406	CCL244CONTROL1	CCL244R1	OK	10.1126	1.80678	-2.48467	-3.81212	0.0003	0.527083	no
ENST00000374082	ENSG00000138293	NCOA4	10:51565107-51590734	CCL244CONTROL1	CCL244R1	OK	0.000591412	2.39536	11.9838	0.105086	0.0275	0.942621	no
ENST00000374296	ENSG00000182749	PAQR7	1:26186103-26197744	CCL244CONTROL1	CCL244R1	OK	11.1166	4.53378	-1.29393	-2.16022	0.02905	0.942621	no
ENST00000374561	ENSG00000117318	ID3	1:23884408-23886285	CCL244CONTROL1	CCL244R1	OK	3.18171	16.7736	2.39832	2.27441	0.0418	0.942621	no
ENST00000374695	ENSG00000142798	HSPG2	1:22138757-22263790	CCL244CONTROL1	CCL244R1	OK	12.3686	4.11278	-1.58849	-2.3749	0.0179	0.942621	no
ENST00000374727	ENSG00000089472	HEPH	X:65382390-65488709	CCL244CONTROL1	CCL244R1	OK	2.8303	0.548445	-2.36753	-2.34118	0.04015	0.942621	no
ENST00000374790	ENSG00000148498	PARD3	10:34398487-35104253	CCL244CONTROL1	CCL244R1	OK	0.000474517	1.62325	11.7401	0.212497	0.02265	0.942621	no
ENST00000374793	ENSG00000136824	SMC2	9:106856540-106903698	CCL244CONTROL1	CCL244R1	OK	0.367218	1.92647	2.39126	2.28655	0.04175	0.942621	no
ENST00000375167	ENSG00000188486	H2AFX	11:118964563-118966177	CCL244CONTROL1	CCL244R1	OK	84.7336	227.267	1.42338	2.08928	0.03775	0.942621	no
ENST00000375256	ENSG00000165244	ZNF367	9:99148222-99180611	CCL244CONTROL1	CCL244R1	OK	2.29195	6.53907	1.51251	2.43662	0.0184	0.942621	no
ENST00000375281	ENSG00000204335	SP5	2:171034654-171574588	CCL244CONTROL1	CCL244R1	OK	4.75918	0.998347	-2.2531	-2.20942	0.04295	0.942621	no
ENST00000375321	ENSG00000107968	MAP3K8	10:30722865-30750762	CCL244CONTROL1	CCL244R1	OK	1.65403	0.00186615	-9.79171	-0.28702	0.04395	0.942621	no
ENST00000375486	ENSG00000117115	PADI2	1:17388864-17445948	CCL244CONTROL1	CCL244R1	OK	2.21136	0.231182	-3.25783	-3.03713	0.03095	0.942621	no
ENST00000375533	ENSG00000095739	BAMBI	10:28966270-28971868	CCL244CONTROL1	CCL244R1	OK	44.3881	8.01637	-2.46915	-3.52329	0.0009	0.942621	no
ENST00000375537	ENSG00000204371	EHMT2	6:31847535-31865464	CCL244CONTROL1	CCL244R1	OK	2.33056	11.9319	2.35607	2.77938	0.01585	0.942621	no
ENST00000376091	ENSG00000171365	CLCN5	X:49687224-49863892	CCL244CONTROL1	CCL244R1	OK	0.00041136	1.22958	11.5455	0.0916343	0.0099	0.942621	no
ENST00000376112	ENSG00000125968	ID1	20:30193085-30194318	CCL244CONTROL1	CCL244R1	OK	53.1907	157.564	1.56669	2.38764	0.01545	0.942621	no
ENST00000376257	ENSG00000137310	TCF19	6:31126318-31154249	CCL244CONTROL1	CCL244R1	OK	1.2015	7.90391	2.71773	3.14837	0.0111	0.942621	no
ENST00000376468	ENSG00000120937	NPPB	1:11917520-11918988	CCL244CONTROL1	CCL244R1	OK	1.22471	0	-1.15361728716688	NA	0.0073	0.942621	no
ENST00000376591	ENSG00000167608	TMC4	19:54663845-54676944	CCL244CONTROL1	CCL244R1	OK	1.46725	0.000956849	-10.5825	-0.151792	0.03585	0.942621	no
ENST00000376757	ENSG00000172830	SSH3	11:67070918-67080078	CCL244CONTROL1	CCL244R1	OK	1.62197	0.00155463	-10.027	-0.252141	0.03255	0.942621	no
ENST00000376782	ENSG00000066379	ZNRD1	6:29968787-30032686	CCL244CONTROL1	CCL244R1	OK	9.86582	0.0017502	-12.4607	-0.0790081	0.0142	0.942621	no
ENST00000376835	ENSG00000077984	CST7	20:24929865-24940564	CCL244CONTROL1	CCL244R1	OK	10.3112	3.22551	-1.67662	-2.21609	0.03455	0.942621	no
ENST00000376854	ENSG00000135045	C9orf40	9:77561496-77567802	CCL244CONTROL1	CCL244R1	OK	2.01325	5.38048	1.41821	2.09791	0.03925	0.942621	no
ENST00000377104	ENSG00000136158	SPRY2	13:80910110-80915086	CCL244CONTROL1	CCL244R1	OK	9.08953	2.55825	-1.82905	-2.23823	0.04185	0.942621	no
ENST00000377364	ENSG00000124529	HIST1H4B	6:26027123-26027480	CCL244CONTROL1	CCL244R1	OK	638.964	5042.35	2.98029	4.00026	0.0011	0.942621	no
ENST00000377394	ENSG00000168066	SF1	11:64532077-64546258	CCL244CONTROL1	CCL244R1	OK	1.78611	0.00107906	-10.6928	-0.207532	0.0373	0.942621	no
ENST00000377401	ENSG00000185130	HIST1H2BL	6:27775256-27775709	CCL244CONTROL1	CCL244R1	OK	331.045	3897.43	3.55742	4.43205	0.0007	0.935763	no
ENST00000377459	ENSG00000184825	HIST1H2AH	6:27114860-27115317	CCL244CONTROL1	CCL244R1	OK	689.276	6466.06	3.22974	3.57122	0.00345	0.942621	no
ENST00000377727	ENSG00000158406	HIST1H4H	6:26281282-26285762	CCL244CONTROL1	CCL244R1	OK	441.793	3542.27	3.00323	3.92587	0.00075	0.942621	no
ENST00000377768	ENSG00000089006	SNX5	20:17922240-18039832	CCL244CONTROL1	CCL244R1	OK	2.60405	2.05935e-06	-20.2701	-0.00059076	0.02355	0.942621	no
ENST00000377777	ENSG00000158373	HIST1H2BD	6:26158348-26171577	CCL244CONTROL1	CCL244R1	OK	696.658	3756.22	2.43076	2.81674	0.00825	0.942621	no
ENST00000377791	ENSG00000180573	HIST1H2AC	6:26124372-26139344	CCL244CONTROL1	CCL244R1	OK	582.262	3415.19	2.55223	3.02284	0.00705	0.942621	no
ENST00000377803	ENSG00000197061	HIST1H4C	6:26104103-26104518	CCL244CONTROL1	CCL244R1	OK	696.965	5560.8	2.99613	3.62547	0.00145	0.942621	no
ENST00000377809	ENSG00000072518	MARK2	11:63606399-63678491	CCL244CONTROL1	CCL244R1	OK	0.000694594	1.06038	10.5761	0.223273	0.0262	0.942621	no
ENST00000378206	ENSG00000169598	DFFB	1:3773844-3801993	CCL244CONTROL1	CCL244R1	OK	0.81948	2.93867	1.84238	2.09336	0.0419	0.942621	no
ENST00000378331	ENSG00000152455	SUV39H2	10:14920818-14996431	CCL244CONTROL1	CCL244R1	OK	0.00074177	2.7273	11.8442	0.164324	0.02125	0.942621	no
ENST00000378895	ENSG00000167536	DHRS13	17:27224755-27230089	CCL244CONTROL1	CCL244R1	OK	2.2656	6.88957	1.60452	2.1149	0.0331	0.942621	no
ENST00000379177	ENSG00000005889	ZFX	X:24164341-24234372	CCL244CONTROL1	CCL244R1	OK	1.19992	0.000445601	-11.3949	-0.253366	0.0284	0.942621	no
ENST00000379270	ENSG00000130066	SAT1	X:23801274-23804343	CCL244CONTROL1	CCL244R1	OK	238.35	43.9056	-2.4406	-2.87151	0.0061	0.942621	no
ENST00000379286	ENSG00000089063	TMEM230	20:5080485-5093749	CCL244CONTROL1	CCL244R1	OK	0.000430467	1.46607	11.7338	0.0525315	0.0336	0.942621	no
ENST00000379341	ENSG00000123131	PRDX4	X:23682378-23704516	CCL244CONTROL1	CCL244R1	OK	26.8354	72.7876	1.43956	2.36693	0.016	0.942621	no
ENST00000379375	ENSG00000078401	EDN1	6:12290595-12314628	CCL244CONTROL1	CCL244R1	OK	6.58172	1.22996	-2.41985	-3.29204	0.0047	0.942621	no
ENST00000379446	ENSG00000111859	NEDD9	6:11173684-11382581	CCL244CONTROL1	CCL244R1	OK	6.48312	1.91854	-1.75668	-2.78833	0.0078	0.942621	no
ENST00000379561	ENSG00000150907	FOXO1	13:41129803-41240734	CCL244CONTROL1	CCL244R1	OK	5.67635	2.47344	-1.19844	-1.99056	0.04525	0.942621	no
ENST00000379567	ENSG00000125843	AP5S1	20:3801177-3805949	CCL244CONTROL1	CCL244R1	OK	1.57191	0.00267985	-9.19615	-0.26561	0.0349	0.942621	no
ENST00000379694	ENSG00000205336	GPR56	16:57644563-57698944	CCL244CONTROL1	CCL244R1	OK	0.329168	1.52824	2.21498	1.27593	0.04345	0.942621	no
ENST00000379789	ENSG00000170525	PFKFB3	10:6186880-6277495	CCL244CONTROL1	CCL244R1	OK	0.000310826	4.03765	13.6651	0.113968	0.0137	0.942621	no
ENST00000379803	ENSG00000127511	SIN3B	19:16940210-16991164	CCL244CONTROL1	CCL244R1	OK	1.44932	0.00122173	-10.2122	-0.294812	0.0497	0.942621	no
ENST00000380071	ENSG00000133119	RFC3	13:34392185-34540695	CCL244CONTROL1	CCL244R1	OK	2.1187	11.9852	2.50001	3.44308	0.00205	0.942621	no
ENST00000380359	ENSG00000173848	NET1	10:5454513-5501019	CCL244CONTROL1	CCL244R1	OK	2.61249	0.000452269	-12.496	-0.116977	0.01525	0.942621	no
ENST00000380665	ENSG00000184661	CDCA2	8:25316512-25365436	CCL244CONTROL1	CCL244R1	OK	0.771408	3.83243	2.3127	2.13287	0.0376	0.942621	no
ENST00000380774	ENSG00000152942	RAD17	5:68646810-68710628	CCL244CONTROL1	CCL244R1	OK	0.00127944	1.62239	10.3084	0.1713	0.0247	0.942621	no
ENST00000380851	ENSG00000101365	IDH3B	20:2639040-2644865	CCL244CONTROL1	CCL244R1	OK	14.4956	0.00501476	-11.4971	-0.201023	0.0465	0.942621	no
ENST00000381020	ENSG00000165556	CDX2	13:28536273-28545276	CCL244CONTROL1	CCL244R1	OK	23.3267	8.34176	-1.48356	-2.32085	0.0202	0.942621	no
ENST00000381132	ENSG00000159200	RCAN1	21:35885439-35987441	CCL244CONTROL1	CCL244R1	OK	0.00108758	1.09411	9.97442	0.162338	0.0184	0.942621	no
ENST00000381246	ENSG00000092470	WDR76	15:44119160-44160617	CCL244CONTROL1	CCL244R1	OK	1.50917	5.0566	1.74441	2.11307	0.03805	0.942621	no
ENST00000381323	ENSG00000197872	FAM49A	2:16730726-16847599	CCL244CONTROL1	CCL244R1	OK	1.53623	0.418915	-1.87467	-2.26594	0.03575	0.942621	no
ENST00000381395	ENSG00000167244	IGF2	11:2150341-2193107	CCL244CONTROL1	CCL244R1	OK	3.88162	1.38892	-1.48269	-2.03767	0.0428	0.942621	no
ENST00000381434	ENSG00000137033	IL33	9:6215804-6257983	CCL244CONTROL1	CCL244R1	OK	9.84018	3.4636	-1.50641	-2.04797	0.04085	0.942621	no
ENST00000382011	ENSG00000100297	MCM5	22:35796055-35821423	CCL244CONTROL1	CCL244R1	OK	4.46007	23.133	2.37482	2.09992	0.04375	0.942621	no
ENST00000382214	ENSG00000125826	RBCK1	20:388141-411610	CCL244CONTROL1	CCL244R1	OK	2.33161	0.00130657	-10.8013	-0.172605	0.0412	0.942621	no
ENST00000382263	ENSG00000127863	TNFRSF19	13:24144508-24250232	CCL244CONTROL1	CCL244R1	OK	3.07367	0.631374	-2.2834	-2.42166	0.0255	0.942621	no
ENST00000382592	ENSG00000150457	LATS2	13:21547170-21635686	CCL244CONTROL1	CCL244R1	OK	8.89698	2.59097	-1.77982	-2.61066	0.01055	0.942621	no
ENST00000382727	ENSG00000128829	EIF2AK4	15:40226346-40327797	CCL244CONTROL1	CCL244R1	OK	1.73667	0.000965938	-10.8121	-0.261758	0.04595	0.942621	no
ENST00000383056	ENSG00000134779	TPGS2	18:33877676-34812135	CCL244CONTROL1	CCL244R1	OK	0.00101838	5.55272	12.4127	0.130686	0.0216	0.942621	no
ENST00000383759	ENSG00000136059	VILL	3:38029549-38048679	CCL244CONTROL1	CCL244R1	OK	6.34382	0.839583	-2.91761	-2.92184	0.01695	0.942621	no
ENST00000383806	ENSG00000144554	FANCD2	3:10068097-10149915	CCL244CONTROL1	CCL244R1	OK	1.30882	0.000192896	-12.7282	-0.0800527	0.009	0.942621	no
ENST00000384962	ENSG00000207695	MIR184	15:79484048-79590580	CCL244CONTROL1	CCL244R1	OK	45.272	0	-5.53206755228903	NA	0.0223	0.942621	no
ENST00000388711	ENSG00000135052	GOLM1	9:88641060-88715088	CCL244CONTROL1	CCL244R1	OK	2.90639	0.000418767	-12.7608	-0.102235	0.0099	0.942621	no
ENST00000388825	ENSG00000211445	GPX3	5:150400123-150408554	CCL244CONTROL1	CCL244R1	OK	15.1588	4.7811	-1.66474	-2.09696	0.038	0.942621	no
ENST00000388934	ENSG00000172478	C2orf54	2:241825464-241836306	CCL244CONTROL1	CCL244R1	OK	7.52972	0.765633	-3.29787	-3.58451	0.0071	0.942621	no
ENST00000389017	ENSG00000196544	C17orf59	17:8091651-8093564	CCL244CONTROL1	CCL244R1	OK	1.93691	5.66988	1.54956	2.22366	0.03715	0.942621	no
ENST00000389078	ENSG00000246705	H2AFJ	12:14927269-14930936	CCL244CONTROL1	CCL244R1	OK	0	1.18857	1.12998852838538	NA	0.00395	0.942621	no
ENST00000389272	ENSG00000168610	STAT3	17:40465341-40540586	CCL244CONTROL1	CCL244R1	OK	0.000886202	1.89535	11.0625	0.113475	0.0327	0.942621	no
ENST00000390015	ENSG00000171298	GAA	17:78075354-78093678	CCL244CONTROL1	CCL244R1	OK	10.4519	2.51304	-2.05626	-2.47931	0.0294	0.942621	no
ENST00000390651	ENSG00000204604	ZNF468	19:53300660-53541151	CCL244CONTROL1	CCL244R1	OK	2.89143	0.00133071	-11.0854	-0.214287	0.04965	0.942621	no
ENST00000391285	ENSG00000212587	SNORA40	6:111169748-111169876	CCL244CONTROL1	CCL244R1	OK	0	55.7806	5.82732618897346	NA	0.0293	0.942621	no
ENST00000391418	ENSG00000212724	KRTAP2-3	17:39215494-39216344	CCL244CONTROL1	CCL244R1	OK	1.76675	0	-1.46819228975389	NA	0.00065	0.888232	no
ENST00000391707	ENSG00000226179	LINC00685	X:281384-285848	CCL244CONTROL1	CCL244R1	OK	10.3911	352.594	5.08458	6.96619	0.0003	0.527083	no
ENST00000391721	ENSG00000022556	NLRP2	19:55434876-55512510	CCL244CONTROL1	CCL244R1	OK	0.000484394	1.09893	11.1476	0.117884	0.0183	0.942621	no
ENST00000391844	ENSG00000105221	AKT2	19:40736223-40791443	CCL244CONTROL1	CCL244R1	OK	6.46133	0.00117251	-12.428	-0.157473	0.0192	0.942621	no
ENST00000391953	ENSG00000104859	CLASRP	19:45542297-45574214	CCL244CONTROL1	CCL244R1	OK	2.1195	0.000974469	-11.0868	-0.127458	0.0298	0.942621	no
ENST00000392011	ENSG00000130147	SH3BP4	2:235860616-235964358	CCL244CONTROL1	CCL244R1	OK	19.8205	7.29864	-1.44129	-1.95088	0.0484	0.942621	no
ENST00000392021	ENSG00000085978	ATG16L1	2:234118696-234204320	CCL244CONTROL1	CCL244R1	OK	1.08039	1.33805e-10	-32.9107	-9.25851e-08	0.04865	0.942621	no
ENST00000392027	ENSG00000163283	ALPP	2:233243243-233247599	CCL244CONTROL1	CCL244R1	OK	5.67628	0.438659	-3.69377	-4.07245	0.00245	0.942621	no
ENST00000392640	ENSG00000138382	METTL5	2:170648442-170681441	CCL244CONTROL1	CCL244R1	OK	6.79481	0.00155765	-12.0908	-0.0764052	0.02385	0.942621	no
ENST00000392779	ENSG00000169255	B3GALNT1	3:160801670-160971320	CCL244CONTROL1	CCL244R1	OK	0.000401801	2.24393	12.4473	0.102431	0.0175	0.942621	no
ENST00000392995	ENSG00000170836	PPM1D	17:58677543-58741849	CCL244CONTROL1	CCL244R1	OK	0.00132407	5.45649	12.0088	0.301382	0.0306	0.942621	no
ENST00000393328	ENSG00000121067	SPOP	17:47676245-47755596	CCL244CONTROL1	CCL244R1	OK	0.000945068	1.58883	10.7153	0.191166	0.03025	0.942621	no
ENST00000393576	ENSG00000198055	GRK6	5:176829140-176883283	CCL244CONTROL1	CCL244R1	OK	2.59195	0.00130732	-10.9532	-0.145247	0.036	0.942621	no
ENST00000393587	ENSG00000126903	SLC10A3	X:153715644-153719016	CCL244CONTROL1	CCL244R1	OK	2.56573	0.00186588	-10.4253	-0.21904	0.02655	0.942621	no
ENST00000393915	ENSG00000072571	HMMR	5:162887208-162921064	CCL244CONTROL1	CCL244R1	OK	0.948634	4.59224	2.27528	2.21543	0.04635	0.942621	no
ENST00000393957	ENSG00000159713	TPPP3	16:67423711-67427438	CCL244CONTROL1	CCL244R1	OK	1.73497	0	-1.45152500812255	NA	0.0004	0.630697	no
ENST00000394058	ENSG00000137171	KLC4	6:43005354-43042837	CCL244CONTROL1	CCL244R1	OK	0.000189433	2.71856	13.8089	0.0402497	0.0334	0.942621	no
ENST00000394211	ENSG00000141738	GRB7	17:37894179-37903544	CCL244CONTROL1	CCL244R1	OK	1.07333	4.82831	2.16942	2.07204	0.0442	0.942621	no
ENST00000394519	ENSG00000013561	RNF14	5:141323143-141369856	CCL244CONTROL1	CCL244R1	OK	0.0012404	1.29477	10.0277	0.241653	0.0442	0.942621	no
ENST00000394815	ENSG00000167767	KRT80	12:52562779-52585784	CCL244CONTROL1	CCL244R1	OK	9.4439	3.00327	-1.65285	-2.54223	0.0117	0.942621	no
ENST00000394957	ENSG00000107738	C10orf54	10:73156690-73575702	CCL244CONTROL1	CCL244R1	OK	14.2689	5.21642	-1.45175	-2.09943	0.0355	0.942621	no
ENST00000394963	ENSG00000066117	SMARCD1	12:50478754-50494495	CCL244CONTROL1	CCL244R1	OK	1.53653	0.000262625	-12.5144	-0.0770585	0.0101	0.942621	no
ENST00000395246	ENSG00000158985	CDC42SE2	5:130581185-130734140	CCL244CONTROL1	CCL244R1	OK	0.00147027	2.5634	10.7678	0.352486	0.0461	0.942621	no
ENST00000395284	ENSG00000170312	CDK1	10:62538088-62554610	CCL244CONTROL1	CCL244R1	OK	10.439	28.8064	1.46441	2.03682	0.04165	0.942621	no
ENST00000395343	ENSG00000101191	DIDO1	20:61509089-61569304	CCL244CONTROL1	CCL244R1	OK	0.470544	1.86464	1.9865	1.21171	0.03945	0.942621	no
ENST00000395425	ENSG00000126787	DLGAP5	14:55614829-55658396	CCL244CONTROL1	CCL244R1	OK	1.69871	5.76695	1.76337	2.1162	0.04045	0.942621	no
ENST00000395449	ENSG00000149182	ARFGAP2	11:46958239-47198676	CCL244CONTROL1	CCL244R1	OK	5.92946	0.000330317	-14.1318	-0.0497202	0.0041	0.942621	no
ENST00000395573	ENSG00000100528	CNIH1	14:54893653-54908149	CCL244CONTROL1	CCL244R1	OK	0.000894449	4.06014	12.1482	0.0760006	0.03625	0.942621	no
ENST00000395954	ENSG00000019186	CYP24A1	20:52769987-52790512	CCL244CONTROL1	CCL244R1	OK	0.584735	11.3489	4.27863	3.94585	0.02315	0.942621	no
ENST00000395968	ENSG00000178715	RP11-169K16.8	1:16154723-16155167	CCL244CONTROL1	CCL244R1	OK	2.48984	0	-1.8031608941719	NA	0.0047	0.942621	no
ENST00000396028	ENSG00000111731	C2CD5	12:22601516-22697480	CCL244CONTROL1	CCL244R1	OK	0.00129388	2.55164	10.9455	0.31328	0.0377	0.942621	no
ENST00000396029	ENSG00000101126	ADNP	20:49505584-49575092	CCL244CONTROL1	CCL244R1	OK	1.34394	5.92029e-05	-14.4704	-0.0350584	0.0432	0.942621	no
ENST00000396105	ENSG00000124201	ZNFX1	20:47835883-47905797	CCL244CONTROL1	CCL244R1	OK	2.86626	0.000365118	-12.9385	-0.132643	0.02585	0.942621	no
ENST00000396131	ENSG00000213700	RPL17P50	10:74765590-74766353	CCL244CONTROL1	CCL244R1	OK	1.05097	0	-1.03630638934689	NA	0.0271	0.942621	no
ENST00000396148	ENSG00000123080	CDKN2C	1:51426416-51440305	CCL244CONTROL1	CCL244R1	OK	0.833673	3.63206	2.12324	2.58494	0.02215	0.942621	no
ENST00000396265	ENSG00000100300	TSPO	22:43547519-43559248	CCL244CONTROL1	CCL244R1	OK	0.00540193	20.0437	11.8574	0.196395	0.0222	0.942621	no
ENST00000396335	ENSG00000069966	GNB5	15:52407273-52587995	CCL244CONTROL1	CCL244R1	OK	1.78558	0.000186551	-13.2245	-0.0414414	0.01555	0.942621	no
ENST00000396376	ENSG00000086300	SNX10	7:26331514-26416321	CCL244CONTROL1	CCL244R1	OK	1.51231	0.000444868	-11.7311	-0.0810438	0.0089	0.942621	no
ENST00000396664	ENSG00000122644	ARL4A	7:12726480-12730559	CCL244CONTROL1	CCL244R1	OK	0.00146812	2.69851	10.844	0.10174	0.04125	0.942621	no
ENST00000396980	ENSG00000233822	HIST1H2BN	6:27806322-27823582	CCL244CONTROL1	CCL244R1	OK	45.3287	268.922	2.56869	2.78965	0.00735	0.942621	no
ENST00000396984	ENSG00000180596	HIST1H2BC	6:26115100-26124154	CCL244CONTROL1	CCL244R1	OK	483.199	3583.64	2.89074	3.02312	0.0139	0.942621	no
ENST00000397152	ENSG00000101363	MANBAL	20:35918040-35945663	CCL244CONTROL1	CCL244R1	OK	0.00296363	4.14025	10.4481	0.280838	0.03295	0.942621	no
ENST00000397379	ENSG00000100802	C14orf93	14:23451906-23479375	CCL244CONTROL1	CCL244R1	OK	1.68094	0.0011689	-10.4899	-0.145322	0.0197	0.942621	no
ENST00000397632	ENSG00000185187	SIGIRR	11:405715-417455	CCL244CONTROL1	CCL244R1	OK	0.00108429	3.02657	11.4467	0.117545	0.0129	0.942621	no
ENST00000397753	ENSG00000196323	ZBTB44	11:130096571-130273552	CCL244CONTROL1	CCL244R1	OK	0.000472825	1.56759	11.695	0.140626	0.02165	0.942621	no
ENST00000398253	ENSG00000184939	ZFP90	16:68563992-68623415	CCL244CONTROL1	CCL244R1	OK	1.12073	0.00125735	-9.79983	-0.349508	0.0445	0.942621	no
ENST00000398316	ENSG00000102531	FNDC3A	13:49550047-49783915	CCL244CONTROL1	CCL244R1	OK	1.58285	0.00044654	-11.7914	-0.196881	0.02115	0.942621	no
ENST00000398810	ENSG00000106070	GRB10	7:50657759-50861159	CCL244CONTROL1	CCL244R1	OK	0.00118903	1.42092	10.2228	0.377798	0.0467	0.942621	no
ENST00000398879	ENSG00000136205	TNS3	7:47314751-47622156	CCL244CONTROL1	CCL244R1	OK	0.000457422	1.10141	11.2335	0.182957	0.03385	0.942621	no
ENST00000398965	ENSG00000164074	C4orf29	4:128838959-128960866	CCL244CONTROL1	CCL244R1	OK	1.90781	0.00175033	-10.0901	-0.236571	0.03085	0.942621	no
ENST00000399075	ENSG00000164096	C4orf3	4:120218206-120225600	CCL244CONTROL1	CCL244R1	OK	16.0997	5.33892	-1.59242	-2.41246	0.01765	0.942621	no
ENST00000399179	ENSG00000138346	DNA2	10:70173820-70231879	CCL244CONTROL1	CCL244R1	OK	0.454123	3.87823	3.09425	1.77693	0.0178	0.942621	no
ENST00000399302	ENSG00000060749	QSER1	11:32914723-33037285	CCL244CONTROL1	CCL244R1	OK	1.28092	3.06924	1.26071	2.10377	0.0325	0.942621	no
ENST00000399975	ENSG00000156256	USP16	21:30396575-30426809	CCL244CONTROL1	CCL244R1	OK	2.94466	8.33061	1.50032	2.00234	0.0465	0.942621	no
ENST00000400345	ENSG00000049759	NEDD4L	18:55711598-56068772	CCL244CONTROL1	CCL244R1	OK	1.5309	0.00123259	-10.2785	-0.209301	0.046	0.942621	no
ENST00000400466	ENSG00000141384	TAF4B	18:23805899-23971649	CCL244CONTROL1	CCL244R1	OK	0.000784068	2.13108	11.4083	0.130104	0.01775	0.942621	no
ENST00000400664	ENSG00000179023	KLHDC7A	1:18807423-18812478	CCL244CONTROL1	CCL244R1	OK	2.04418	0.749624	-1.44729	-2.02802	0.04045	0.942621	no
ENST00000401950	ENSG00000100330	MTMR3	22:30279143-30573064	CCL244CONTROL1	CCL244R1	OK	2.539	0.00100528	-11.3024	-0.316968	0.04925	0.942621	no
ENST00000402218	ENSG00000084764	MAPRE3	2:27070614-27250064	CCL244CONTROL1	CCL244R1	OK	2.69436	0.00644902	-8.70665	-0.304169	0.04845	0.942621	no
ENST00000402306	ENSG00000106608	URGCP	7:43906156-43966010	CCL244CONTROL1	CCL244R1	OK	4.20799	0.00108249	-11.9246	-0.208104	0.03385	0.942621	no
ENST00000402338	ENSG00000100162	CENPM	22:42334724-42343168	CCL244CONTROL1	CCL244R1	OK	0.00331192	6.90776	11.0263	0.198188	0.02325	0.942621	no
ENST00000402676	ENSG00000131016	AKAP12	6:151561133-151679692	CCL244CONTROL1	CCL244R1	OK	0.626378	3.68997	2.5585	2.3047	0.0327	0.942621	no
ENST00000403027	ENSG00000155508	CNOT8	5:154198050-154256353	CCL244CONTROL1	CCL244R1	OK	0.000695551	4.54063	12.6724	0.143635	0.01285	0.942621	no
ENST00000403433	ENSG00000160679	CHTOP	1:153591262-153618782	CCL244CONTROL1	CCL244R1	OK	0.00184707	2.63126	10.4763	0.159724	0.03425	0.942621	no
ENST00000403646	ENSG00000160991	ORAI2	7:102067264-102105323	CCL244CONTROL1	CCL244R1	OK	0.00114541	2.23596	10.9308	0.197521	0.0455	0.942621	no
ENST00000404034	ENSG00000100425	BRD1	22:50166930-50221160	CCL244CONTROL1	CCL244R1	OK	4.52893	0.000197972	-14.4816	-0.0799407	0.0415	0.942621	no
ENST00000406277	ENSG00000147382	FAM58A	X:152853376-152870803	CCL244CONTROL1	CCL244R1	OK	0.753957	6.72701	3.15741	1.85802	0.0263	0.942621	no
ENST00000406988	ENSG00000089356	FXYD3	19:35606731-35615228	CCL244CONTROL1	CCL244R1	OK	113.077	41.1556	-1.45814	-2.11726	0.0379	0.942621	no
ENST00000407246	ENSG00000116171	SCP2	1:53392900-53517375	CCL244CONTROL1	CCL244R1	OK	2.2308	0.000609236	-11.8383	-0.0996686	0.01055	0.942621	no
ENST00000407854	ENSG00000185340	GAS2L1	22:29702571-29708774	CCL244CONTROL1	CCL244R1	OK	0.0016951	1.34218	9.62899	0.252318	0.0418	0.942621	no
ENST00000407936	ENSG00000100142	POLR2F	22:38339527-38439988	CCL244CONTROL1	CCL244R1	OK	0.0119148	11.358	9.89675	0.303857	0.04075	0.942621	no
ENST00000408038	ENSG00000166167	BTRC	10:103113819-103317078	CCL244CONTROL1	CCL244R1	OK	1.0551	4.56274e-05	-14.4971	-0.00137085	0.0211	0.942621	no
ENST00000408905	ENSG00000141376	BCAS3	17:58754813-59488916	CCL244CONTROL1	CCL244R1	OK	0.000482698	1.56339	11.6613	0.126476	0.01385	0.942621	no
ENST00000409223	ENSG00000168427	KLHL30	2:239047362-239064635	CCL244CONTROL1	CCL244R1	OK	0.00120746	1.22032	9.98107	0.2881	0.03545	0.942621	no
ENST00000409262	ENSG00000187605	TET3	2:74211336-74335303	CCL244CONTROL1	CCL244R1	OK	2.89291	1.20514	-1.26332	-1.94882	0.04995	0.942621	no
ENST00000409687	ENSG00000186193	SAPCD2	9:139948597-139965040	CCL244CONTROL1	CCL244R1	OK	8.05946	23.504	1.54415	2.31616	0.02165	0.942621	no
ENST00000409743	ENSG00000115661	STK16	2:220094478-220142892	CCL244CONTROL1	CCL244R1	OK	6.57775	0.00159463	-12.0102	-0.112641	0.01545	0.942621	no
ENST00000410017	ENSG00000144524	COPS7B	2:232597134-232673963	CCL244CONTROL1	CCL244R1	OK	6.14925	0.00174287	-11.7847	-0.257617	0.02565	0.942621	no
ENST00000410092	ENSG00000134278	SPIRE1	18:12437679-12725739	CCL244CONTROL1	CCL244R1	OK	1.12407	0.000166096	-12.7244	-0.0764361	0.0095	0.942621	no
ENST00000410144	ENSG00000222076	RNU2-3P	15:96289032-96289223	CCL244CONTROL1	CCL244R1	OK	159.154	846.84	2.41167	3.64533	0.00145	0.942621	no
ENST00000410797	ENSG00000222729	RNU2-67P	8:110886141-110886247	CCL244CONTROL1	CCL244R1	OK	0	110.179	6.79674050070522	NA	0.0293	0.942621	no
ENST00000411502	ENSG00000181045	SLC26A11	17:78143790-78227299	CCL244CONTROL1	CCL244R1	OK	1.33842	0.000357643	-11.8697	-0.0768955	0.0372	0.942621	no
ENST00000412359	ENSG00000156970	BUB1B	15:40453223-40569688	CCL244CONTROL1	CCL244R1	OK	0.322691	5.99778	4.2162	2.62341	0.03345	0.942621	no
ENST00000412477	ENSG00000141480	ARRB2	17:4613783-4624795	CCL244CONTROL1	CCL244R1	OK	2.81387	0.000778022	-11.8205	-0.09839	0.0142	0.942621	no
ENST00000412922	ENSG00000144524	COPS7B	2:232597134-232673963	CCL244CONTROL1	CCL244R1	OK	0.00100749	4.06254	11.9774	0.141869	0.01755	0.942621	no
ENST00000413580	ENSG00000173868	PHOSPHO1	17:47300723-47308128	CCL244CONTROL1	CCL244R1	OK	1.49277	0.11202	-3.73617	-1.87171	0.03365	0.942621	no
ENST00000413637	ENSG00000223626	LINC01044	13:112976880-112985539	CCL244CONTROL1	CCL244R1	OK	1.3243	0	-1.21679629102279	NA	0.0073	0.942621	no
ENST00000414278	ENSG00000124839	RAB17	2:238482964-238510257	CCL244CONTROL1	CCL244R1	OK	5.94103	0.00291187	-10.9946	-0.284264	0.0369	0.942621	no
ENST00000415113	ENSG00000170653	ATF7	12:53900471-54020199	CCL244CONTROL1	CCL244R1	OK	1.14798	0.000479533	-11.2252	-0.234472	0.02445	0.942621	no
ENST00000415352	ENSG00000167792	NDUFV1	11:67374322-67380006	CCL244CONTROL1	CCL244R1	OK	14.9129	0.000546353	-14.7364	-0.0715548	0.00965	0.942621	no
ENST00000415362	ENSG00000184903	IMMP2L	7:110303109-111202573	CCL244CONTROL1	CCL244R1	OK	1.55641	0.00673185	-7.85301	-0.116887	0.04785	0.942621	no
ENST00000416102	ENSG00000238180	AC017079.4	2:128975161-128975646	CCL244CONTROL1	CCL244R1	OK	0	1.22427	1.15333192476019	NA	0.0293	0.942621	no
ENST00000416600	ENSG00000088888	MAVS	20:3827445-3856770	CCL244CONTROL1	CCL244R1	OK	1.89771	0.00101761	-10.8649	-0.112875	0.02045	0.942621	no
ENST00000416753	ENSG00000012963	UBR7	14:93651295-93695561	CCL244CONTROL1	CCL244R1	OK	1.61141	0.0012837	-10.2938	-0.212332	0.0384	0.942621	no
ENST00000416793	ENSG00000002726	AOC1	7:150521714-150558592	CCL244CONTROL1	CCL244R1	OK	10.3199	1.70509	-2.5975	-2.9506	0.01305	0.942621	no
ENST00000416815	ENSG00000185825	BCAP31	X:152965946-152990152	CCL244CONTROL1	CCL244R1	OK	10.9123	0.00439708	-11.2771	-0.115597	0.022	0.942621	no
ENST00000418458	ENSG00000163938	GNL3	3:52529353-52742182	CCL244CONTROL1	CCL244R1	OK	0.00069126	10.2264	13.8527	0.0844303	0.01095	0.942621	no
ENST00000418781	ENSG00000130023	ERMARD	6:170151717-170181680	CCL244CONTROL1	CCL244R1	OK	0.00297827	2.3989	9.65368	0.319606	0.0396	0.942621	no
ENST00000419074	ENSG00000180198	RCC1	1:28832454-28865812	CCL244CONTROL1	CCL244R1	OK	3.19657e-20	11.6452	68.3037	1.17762e-17	0.0099	0.942621	no
ENST00000420125	ENSG00000121753	BAI2	1:32192717-32230494	CCL244CONTROL1	CCL244R1	OK	1.52028	0.000505827	-11.5534	-0.0927298	0.04025	0.942621	no
ENST00000420213	ENSG00000237167	AC128709.2	3:197185275-197193976	CCL244CONTROL1	CCL244R1	OK	1.1369	0	-1.0955193961214	NA	0.01195	0.942621	no
ENST00000420641	ENSG00000050820	BCAR1	16:75262927-75301951	CCL244CONTROL1	CCL244R1	OK	1.66603	0.000458765	-11.8264	-0.0928626	0.014	0.942621	no
ENST00000420993	ENSG00000025770	NCAPH2	22:50946644-50961901	CCL244CONTROL1	CCL244R1	OK	6.3728	22.4703	1.81802	2.36835	0.0163	0.942621	no
ENST00000421073	ENSG00000225190	PLEKHM1	17:43513265-43568115	CCL244CONTROL1	CCL244R1	OK	1.07588	0.000377417	-11.4771	-0.140843	0.0145	0.942621	no
ENST00000421134	ENSG00000131503	ANKHD1	5:139781398-139973337	CCL244CONTROL1	CCL244R1	OK	0.000169859	5.08561	14.8698	0.0558823	0.0078	0.942621	no
ENST00000421671	ENSG00000161904	LEMD2	6:33738978-33756913	CCL244CONTROL1	CCL244R1	OK	1.75458	0.00098368	-10.8006	-0.152865	0.01845	0.942621	no
ENST00000424181	ENSG00000224977	RP11-160H22.3	1:173991646-173992123	CCL244CONTROL1	CCL244R1	OK	2.6916	0	-1.88424623952767	NA	0.0271	0.942621	no
ENST00000424362	ENSG00000156983	BRPF1	3:9773412-9789702	CCL244CONTROL1	CCL244R1	OK	1.33382	0.000990704	-10.3948	-0.315022	0.0383	0.942621	no
ENST00000424500	ENSG00000234498	RPL13AP20	12:13028432-13029044	CCL244CONTROL1	CCL244R1	OK	2.93888	0	-1.97778546517688	NA	0.00045	0.691796	no
ENST00000424843	ENSG00000147650	LRP12	8:105501458-105601252	CCL244CONTROL1	CCL244R1	OK	0.000856645	1.39933	10.6738	0.241283	0.03145	0.942621	no
ENST00000425053	ENSG00000156976	EIF4A2	3:186499568-186524847	CCL244CONTROL1	CCL244R1	OK	5.54748	1.19773e-09	-32.1089	-4.63117e-07	0.0403	0.942621	no
ENST00000425075	ENSG00000031003	FAM13B	5:137150021-137387650	CCL244CONTROL1	CCL244R1	OK	5.7187	0.000495488	-13.4945	-0.131368	0.01115	0.942621	no
ENST00000425460	ENSG00000105357	MYH14	19:50691442-50813802	CCL244CONTROL1	CCL244R1	OK	8.94456	1.51654	-2.56023	-2.12469	0.04275	0.942621	no
ENST00000425676	ENSG00000221829	FANCG	9:35073831-35080013	CCL244CONTROL1	CCL244R1	OK	1.33899	14.5529	3.44209	2.99819	0.01565	0.942621	no
ENST00000425678	ENSG00000231083	AC011747.6	2:8741021-8763072	CCL244CONTROL1	CCL244R1	OK	21.2471	2.38615	-3.15451	-3.42616	0.01225	0.942621	no
ENST00000425699	ENSG00000188613	NANOS1	10:120789227-120793854	CCL244CONTROL1	CCL244R1	OK	2.60929	0.647264	-2.01123	-2.25305	0.0327	0.942621	no
ENST00000425778	ENSG00000115875	SRSF7	2:38970740-38978636	CCL244CONTROL1	CCL244R1	OK	3.29652	0.000760955	-12.0808	-0.117079	0.02605	0.942621	no
ENST00000425800	ENSG00000227893	LINC00352	13:24072934-24077013	CCL244CONTROL1	CCL244R1	OK	1.37727	0	-1.24930576762186	NA	0.01195	0.942621	no
ENST00000425847	ENSG00000114686	MRPL3	3:131181055-131221827	CCL244CONTROL1	CCL244R1	OK	4.74212	0.000275584	-14.0708	-0.0330158	0.0048	0.942621	no
ENST00000429310	ENSG00000160336	ZNF761	19:53935226-54016227	CCL244CONTROL1	CCL244R1	OK	2.60963	0.00149136	-10.773	-0.42064	0.048	0.942621	no
ENST00000429930	ENSG00000226209	AL138764.1	10:13350144-13350447	CCL244CONTROL1	CCL244R1	OK	0	3.31567	2.10958455260043	NA	0.0293	0.942621	no
ENST00000430046	ENSG00000157107	FCHO2	5:72251807-72386349	CCL244CONTROL1	CCL244R1	OK	1.40839	0.000527559	-11.3824	-0.194673	0.02485	0.942621	no
ENST00000431809	ENSG00000099849	RASSF7	11:537526-564024	CCL244CONTROL1	CCL244R1	OK	1.45456	0.00158788	-9.83926	-0.163502	0.0311	0.942621	no
ENST00000431845	ENSG00000236104	ZBTB22	6:33282182-33285719	CCL244CONTROL1	CCL244R1	OK	1.39143	4.71575	1.76092	2.26777	0.0327	0.942621	no
ENST00000431933	ENSG00000117682	DHDDS	1:26758772-26797785	CCL244CONTROL1	CCL244R1	OK	3.66194	0.00100858	-11.8261	-0.199926	0.0278	0.942621	no
ENST00000432279	ENSG00000232129	AC011385.2	5:137887849-137888050	CCL244CONTROL1	CCL244R1	OK	11.9965	0	-3.70005124794906	NA	0.0271	0.942621	no
ENST00000433460	ENSG00000230109	RP11-275N1.1	10:21629161-21661879	CCL244CONTROL1	CCL244R1	OK	1.7797	0	-1.47492918803262	NA	0.0195	0.942621	no
ENST00000433464	ENSG00000106638	TBL2	7:72440164-74366314	CCL244CONTROL1	CCL244R1	OK	1.79445e-65	2.95828	216.647	3.22039e-62	0.04875	0.942621	no
ENST00000433501	ENSG00000148339	SLC25A25	9:130823511-130882122	CCL244CONTROL1	CCL244R1	OK	1.33219	0.000942574	-10.4649	-0.144866	0.0315	0.942621	no
ENST00000434290	ENSG00000180198	RCC1	1:28832454-28865812	CCL244CONTROL1	CCL244R1	OK	2.66106	9.25197e-07	-21.4557	-5.22783e-05	0.04145	0.942621	no
ENST00000434600	ENSG00000005893	LAMP2	X:119561681-119603220	CCL244CONTROL1	CCL244R1	OK	0.000686296	1.05432	10.5852	0.0929932	0.04035	0.942621	no
ENST00000434646	ENSG00000204866	IGFL2	19:46604379-46718714	CCL244CONTROL1	CCL244R1	OK	43.8677	9.93835	-2.14208	-2.11425	0.0387	0.942621	no
ENST00000434858	ENSG00000115750	TAF1B	2:9983482-10074545	CCL244CONTROL1	CCL244R1	OK	0.00266869	1.62827	9.25299	0.232786	0.03515	0.942621	no
ENST00000435556	ENSG00000157881	PANK4	1:2439971-2458039	CCL244CONTROL1	CCL244R1	OK	1.29082	0.00152872	-9.72175	-0.234047	0.03465	0.942621	no
ENST00000436066	ENSG00000166289	PLEKHF1	19:30155962-30166364	CCL244CONTROL1	CCL244R1	OK	0.884005	4.39398	2.3134	2.67908	0.02785	0.942621	no
ENST00000436648	ENSG00000140632	GLYR1	16:4853203-4932361	CCL244CONTROL1	CCL244R1	OK	1.29757	0.000144177	-13.1357	-0.0419375	0.0078	0.942621	no
ENST00000436706	ENSG00000232628	RP11-365O16.3	1:224396448-224400981	CCL244CONTROL1	CCL244R1	OK	1.02475	0	-1.01774378650301	NA	0.005	0.942621	no
ENST00000438408	ENSG00000235126	AC128709.3	3:197171931-197185194	CCL244CONTROL1	CCL244R1	OK	3.89291	0	-2.29069274613743	NA	0.00025	0.495911	no
ENST00000438658	ENSG00000023191	RNH1	11:494511-515605	CCL244CONTROL1	CCL244R1	OK	0.000488503	9.5554	14.2557	0.0719544	0.01145	0.942621	no
ENST00000438704	ENSG00000164104	HMGB2	4:174252845-174256276	CCL244CONTROL1	CCL244R1	OK	21.952	71.4999	1.70359	2.01033	0.0441	0.942621	no
ENST00000438736	ENSG00000233978	AC016735.3	2:43268331-43270921	CCL244CONTROL1	CCL244R1	OK	0	1.41609	1.27267419644085	NA	0.00945	0.942621	no
ENST00000438747	ENSG00000130305	NSUN5	7:72440164-74366314	CCL244CONTROL1	CCL244R1	OK	2.80587	5.86684e-15	-48.7648	-2.83576e-12	0.0407	0.942621	no
ENST00000439575	ENSG00000234182	RP11-118K6.2	10:3052722-3055303	CCL244CONTROL1	CCL244R1	OK	0	1.28006	1.18907178954945	NA	0.00945	0.942621	no
ENST00000439817	ENSG00000198408	MGEA5	10:103544199-103578696	CCL244CONTROL1	CCL244R1	OK	1.36097	0.000410628	-11.6945	-0.157687	0.0225	0.942621	no
ENST00000439929	ENSG00000225770	AC092933.3	3:196263402-196263573	CCL244CONTROL1	CCL244R1	OK	0	29.9904	4.95374947111811	NA	0.00945	0.942621	no
ENST00000440030	ENSG00000235559	NOL5BP	6:28751409-28751781	CCL244CONTROL1	CCL244R1	OK	0	3.05131	2.01838848205011	NA	0.00945	0.942621	no
ENST00000440835	ENSG00000153233	PTPRR	12:71031852-71314623	CCL244CONTROL1	CCL244R1	OK	6.6404	0.619511	-3.42207	-3.48798	0.00715	0.942621	no
ENST00000442215	ENSG00000163832	ELP6	3:47537129-47555251	CCL244CONTROL1	CCL244R1	OK	0.0023672	6.95536	11.5207	0.198885	0.0261	0.942621	no
ENST00000443868	ENSG00000124532	MRS2	6:24403135-24539510	CCL244CONTROL1	CCL244R1	OK	1.84589	0.000491595	-11.8746	-0.0543349	0.02045	0.942621	no
ENST00000443947	ENSG00000229618	AC011288.2	7:13107540-13743774	CCL244CONTROL1	CCL244R1	OK	1.77697	0	-1.4735115916022	NA	0.0046	0.942621	no
ENST00000443953	ENSG00000138363	ATIC	2:216176539-216214487	CCL244CONTROL1	CCL244R1	OK	3.64079	0.00129535	-11.4567	-0.199833	0.02835	0.942621	no
ENST00000444522	ENSG00000158552	ZFAND2B	2:220059958-220074373	CCL244CONTROL1	CCL244R1	OK	0.00282864	1.16625	8.68756	0.219581	0.0467	0.942621	no
ENST00000444624	ENSG00000230186	RP5-998N21.7	1:149320440-149429580	CCL244CONTROL1	CCL244R1	OK	10.7304	132.299	3.62402	5.17967	5e-05	0.122986	no
ENST00000444764	ENSG00000203531	AC016712.1	2:223536504-223574649	CCL244CONTROL1	CCL244R1	OK	1.18685	0	-1.12885426671534	NA	0.0015	0.942621	no
ENST00000445908	ENSG00000229912	AC128709.4	3:197171931-197185194	CCL244CONTROL1	CCL244R1	OK	1.21117	0	-1.14480994723858	NA	0.0325	0.942621	no
ENST00000446113	ENSG00000177054	ZDHHC13	11:19138645-19197969	CCL244CONTROL1	CCL244R1	OK	1.71809	11.9934	2.80336	2.40045	0.0474	0.942621	no
ENST00000446824	ENSG00000256316	HIST1H3F	6:26250369-26250835	CCL244CONTROL1	CCL244R1	OK	310.635	4116.29	3.72805	4.67824	0.0003	0.527083	no
ENST00000448674	ENSG00000235119	RP11-9M16.2	9:117159003-117160783	CCL244CONTROL1	CCL244R1	OK	0	19.2008	4.33634052317031	NA	0.0293	0.942621	no
ENST00000448750	ENSG00000132341	RAN	12:131356423-131362223	CCL244CONTROL1	CCL244R1	OK	9.08402	0.00218602	-12.0208	-0.0946672	0.04695	0.942621	no
ENST00000449538	ENSG00000233822	HIST1H2BN	6:27806322-27823582	CCL244CONTROL1	CCL244R1	OK	35.1862	141.45	2.00721	2.50337	0.0108	0.942621	no
ENST00000449913	ENSG00000145495	MARCH6	5:10352713-10440777	CCL244CONTROL1	CCL244R1	OK	0.00164195	4.08404	11.2804	0.207416	0.0454	0.942621	no
ENST00000450366	ENSG00000115365	LANCL1	2:211189482-211342376	CCL244CONTROL1	CCL244R1	OK	2.98688	0.00110457	-11.4009	-0.375872	0.0426	0.942621	no
ENST00000450791	ENSG00000090615	GOLGA3	12:133345494-133532892	CCL244CONTROL1	CCL244R1	OK	9.72409	2.97895	-1.70676	-2.07541	0.03545	0.942621	no
ENST00000451137	ENSG00000142871	CYR61	1:86046443-86049645	CCL244CONTROL1	CCL244R1	OK	16.0608	2.75535	-2.54323	-3.92696	0.00035	0.566383	no
ENST00000452389	ENSG00000114745	GORASP1	3:39093488-39180394	CCL244CONTROL1	CCL244R1	OK	0.000647555	1.82087	11.4573	0.137449	0.02945	0.942621	no
ENST00000453514	ENSG00000164329	PAPD4	5:78907942-78982471	CCL244CONTROL1	CCL244R1	OK	0.000452548	1.33557	11.5271	0.117527	0.01585	0.942621	no
ENST00000453867	ENSG00000137843	PAK6	15:40453223-40569688	CCL244CONTROL1	CCL244R1	OK	0.000569997	1.1342	10.9584	0.152238	0.0303	0.942621	no
ENST00000453940	ENSG00000137171	KLC4	6:43005354-43042837	CCL244CONTROL1	CCL244R1	OK	4.2483	0.00156229	-11.409	-0.149014	0.0259	0.942621	no
ENST00000454224	ENSG00000236008	AC011747.4	2:8683721-8723922	CCL244CONTROL1	CCL244R1	OK	1.50554	0.530539	-1.50475	-2.11201	0.04195	0.942621	no
ENST00000454367	ENSG00000225226	AC007250.4	2:58503011-58523683	CCL244CONTROL1	CCL244R1	OK	1.0848	0	-1.05990898901869	NA	0.0039	0.942621	no
ENST00000454822	ENSG00000197713	RPE	2:210867288-211036115	CCL244CONTROL1	CCL244R1	OK	3.4301	0.000424496	-12.9802	-0.0720718	0.0101	0.942621	no
ENST00000455168	ENSG00000134108	ARL8B	3:5163904-5229014	CCL244CONTROL1	CCL244R1	OK	0.000466105	3.67555	12.945	0.0589049	0.00515	0.942621	no
ENST00000455322	ENSG00000074054	CLASP1	2:122095351-122407163	CCL244CONTROL1	CCL244R1	OK	0.000221467	1.11686	12.3001	0.143328	0.015	0.942621	no
ENST00000455780	ENSG00000127125	PPCS	1:42895999-43120335	CCL244CONTROL1	CCL244R1	OK	2.77212	0.00473456	-9.19354	-0.175747	0.04895	0.942621	no
ENST00000456128	ENSG00000100284	TOM1	22:35694706-35743985	CCL244CONTROL1	CCL244R1	OK	0.00291455	3.48408	10.2233	0.188169	0.0225	0.942621	no
ENST00000456613	ENSG00000228355	BX322559.3	21:46798115-46799550	CCL244CONTROL1	CCL244R1	OK	2.52761	0	-1.81869107048524	NA	0.0395	0.942621	no
ENST00000457905	ENSG00000160305	DIP2A	21:47878811-47989926	CCL244CONTROL1	CCL244R1	OK	1.03086	0.00144055	-9.483	-0.263216	0.04775	0.942621	no
ENST00000458244	ENSG00000170477	KRT4	12:53200332-53208335	CCL244CONTROL1	CCL244R1	OK	6.43268	0.931265	-2.78816	-2.86162	0.01365	0.942621	no
ENST00000458360	ENSG00000101040	ZMYND8	20:45837858-45985567	CCL244CONTROL1	CCL244R1	OK	1.13998	0.000236765	-12.2333	-0.0693045	0.03475	0.942621	no
ENST00000458469	ENSG00000107130	NCS1	9:132934856-132999583	CCL244CONTROL1	CCL244R1	OK	0.00110435	4.19695	11.8919	0.293415	0.0411	0.942621	no
ENST00000458549	ENSG00000180694	TMEM64	8:91634222-91997485	CCL244CONTROL1	CCL244R1	OK	2.55962	8.29502	1.69632	2.40784	0.0148	0.942621	no
ENST00000459782	ENSG00000025796	SEC63	6:108188959-108295627	CCL244CONTROL1	CCL244R1	OK	1.23881	0.00139062	-9.79901	-0.168494	0.0419	0.942621	no
ENST00000461689	ENSG00000114904	NEK4	3:52744799-52804965	CCL244CONTROL1	CCL244R1	OK	0.000998131	1.33665	10.3871	0.145856	0.04115	0.942621	no
ENST00000461737	ENSG00000102882	MAPK3	16:29262828-30366682	CCL244CONTROL1	CCL244R1	OK	7.64696	3.50282e-08	-27.7018	-2.6991e-06	0.04995	0.942621	no
ENST00000463799	ENSG00000244681	MTHFD2P1	3:95373266-95402037	CCL244CONTROL1	CCL244R1	OK	1.14482	0	-1.10085657732676	NA	0.0177	0.942621	no
ENST00000463836	ENSG00000163584	RPL22L1	3:170582663-170588272	CCL244CONTROL1	CCL244R1	OK	67.7144	215.446	1.66979	2.18883	0.0246	0.942621	no
ENST00000464634	ENSG00000171401	KRT13	17:39657232-39661957	CCL244CONTROL1	CCL244R1	OK	21.9355	0.773414	-4.82588	-3.72351	0.0227	0.942621	no
ENST00000465850	ENSG00000240912	RP11-274J15.2	3:113822095-113822475	CCL244CONTROL1	CCL244R1	OK	0	1.94403	1.55779237269612	NA	0.0293	0.942621	no
ENST00000465876	ENSG00000134709	HOOK1	1:60280457-60342050	CCL244CONTROL1	CCL244R1	OK	1.75773	0.000313498	-12.453	-0.0536599	0.01775	0.942621	no
ENST00000467018	ENSG00000241464	RPL39P38	19:18396152-18396305	CCL244CONTROL1	CCL244R1	OK	0	29.545	4.93286433530552	NA	0.0293	0.942621	no
ENST00000467610	ENSG00000134107	BHLHE40	3:4938492-5027008	CCL244CONTROL1	CCL244R1	OK	2.12921	0.00131385	-10.6623	-0.110616	0.0384	0.942621	no
ENST00000467642	ENSG00000091732	ZC3HC1	7:129593073-129691291	CCL244CONTROL1	CCL244R1	OK	1.07569	0.00221399	-8.9244	-0.232086	0.03655	0.942621	no
ENST00000468275	ENSG00000137074	APTX	9:32972603-33025166	CCL244CONTROL1	CCL244R1	OK	0.00193836	1.36282	9.45755	0.15579	0.03535	0.942621	no
ENST00000470086	ENSG00000204392	LSM2	6:31765172-31774761	CCL244CONTROL1	CCL244R1	OK	5.84338	0.00355505	-10.6827	-0.131644	0.02995	0.942621	no
ENST00000470089	ENSG00000134452	FBXO18	10:5903579-5987863	CCL244CONTROL1	CCL244R1	OK	0.000858066	5.66169	12.6879	0.0573894	0.01345	0.942621	no
ENST00000470284	ENSG00000147382	FAM58A	X:152853376-152870803	CCL244CONTROL1	CCL244R1	OK	0.006481	3.40505	9.03724	0.318879	0.04495	0.942621	no
ENST00000470543	ENSG00000181061	HIGD1A	3:42734154-42846023	CCL244CONTROL1	CCL244R1	OK	9.7273	0.00185803	-12.354	-0.121616	0.02105	0.942621	no
ENST00000470810	ENSG00000118990	GLRXP3	5:161178453-161178774	CCL244CONTROL1	CCL244R1	OK	2.98628	0	-1.99504304997227	NA	0.0271	0.942621	no
ENST00000471462	ENSG00000157303	SUSD3	9:95820988-95847420	CCL244CONTROL1	CCL244R1	OK	6.42814	0.00555447	-10.1765	-0.208192	0.02745	0.942621	no
ENST00000472596	ENSG00000239774	RP11-496B10.3	3:180244942-180319723	CCL244CONTROL1	CCL244R1	OK	1.3353	0	-1.22360789499323	NA	0.0117	0.942621	no
ENST00000473291	ENSG00000132297	HHLA1	8:133036466-133123406	CCL244CONTROL1	CCL244R1	OK	2.30406	0.670803	-1.78022	-2.16012	0.04325	0.942621	no
ENST00000474249	ENSG00000111640	GAPDH	12:6643092-6647537	CCL244CONTROL1	CCL244R1	OK	3.57826	2.21168e-47	-156.825	-2.66139e-44	0.04225	0.942621	no
ENST00000474903	ENSG00000171109	MFN1	3:179065479-179112719	CCL244CONTROL1	CCL244R1	OK	0.000864488	1.47238	10.734	0.108083	0.01885	0.942621	no
ENST00000475409	ENSG00000156976	EIF4A2	3:186499568-186524847	CCL244CONTROL1	CCL244R1	OK	2.03787e-39	8.79559	131.665	1.09221e-36	0.04085	0.942621	no
ENST00000475656	ENSG00000163322	FAM175A	4:84377084-84444501	CCL244CONTROL1	CCL244R1	OK	0.00113833	2.07688	10.8333	0.210458	0.0278	0.942621	no
ENST00000475828	ENSG00000163875	MEAF6	1:37955560-37980420	CCL244CONTROL1	CCL244R1	OK	6.26675	0.00167376	-11.8704	-0.162552	0.0201	0.942621	no
ENST00000476527	ENSG00000131381	ZFYVE20	3:15111579-15140670	CCL244CONTROL1	CCL244R1	OK	0.000851302	1.21783	10.4824	0.169676	0.02375	0.942621	no
ENST00000476731	ENSG00000173846	PLK3	1:45265896-45272957	CCL244CONTROL1	CCL244R1	OK	10.2922	0.00159825	-12.6528	-0.0766895	0.0102	0.942621	no
ENST00000476895	ENSG00000165487	MICU2	13:22066835-22178353	CCL244CONTROL1	CCL244R1	OK	0.00169559	6.55869	11.9174	0.0704625	0.047	0.942621	no
ENST00000477932	ENSG00000131069	ACSS2	20:33432522-33515769	CCL244CONTROL1	CCL244R1	OK	2.62155	0.000185412	-13.7874	-0.0389872	0.01405	0.942621	no
ENST00000479150	ENSG00000121578	B4GALT4	3:118930578-119009513	CCL244CONTROL1	CCL244R1	OK	0.00427173	4.14003	9.9206	0.118727	0.0412	0.942621	no
ENST00000480284	ENSG00000243479	MNX1-AS1	7:156803498-156809120	CCL244CONTROL1	CCL244R1	OK	1.58	5.5749	1.81902	2.24372	0.03915	0.942621	no
ENST00000480436	ENSG00000089123	TASP1	20:13202417-13619587	CCL244CONTROL1	CCL244R1	OK	1.23986	0.000640073	-10.9197	-0.0995704	0.04495	0.942621	no
ENST00000480861	ENSG00000106348	IMPDH1	7:128032330-128090500	CCL244CONTROL1	CCL244R1	OK	0.000958331	5.0085	12.3516	0.125511	0.0137	0.942621	no
ENST00000481132	ENSG00000003436	TFPI	2:187866602-188430487	CCL244CONTROL1	CCL244R1	OK	1.27082	0.303191	-2.06747	-2.20483	0.04555	0.942621	no
ENST00000481230	ENSG00000102882	MAPK3	16:29262828-30366682	CCL244CONTROL1	CCL244R1	OK	15.5634	3.9465e-29	-98.3154	-6.92308e-27	0.0404	0.942621	no
ENST00000481530	ENSG00000163507	KIAA1524	3:108268715-108308491	CCL244CONTROL1	CCL244R1	OK	0.60454	4.56628	2.91711	2.75227	0.0228	0.942621	no
ENST00000481889	ENSG00000025434	NR1H3	11:47260852-47290396	CCL244CONTROL1	CCL244R1	OK	1.72772	0.00112617	-10.5832	-0.121438	0.03015	0.942621	no
ENST00000482918	ENSG00000134330	IAH1	2:9563696-9695921	CCL244CONTROL1	CCL244R1	OK	9.29539	0.00175936	-12.3673	-0.0975695	0.01545	0.942621	no
ENST00000486013	ENSG00000131558	EXOC4	7:132937828-133751342	CCL244CONTROL1	CCL244R1	OK	3.33165	0.00205109	-10.6656	-0.207444	0.0248	0.942621	no
ENST00000486420	ENSG00000171159	C9orf16	9:130922538-130926207	CCL244CONTROL1	CCL244R1	OK	19.7371	0.0026838	-12.8443	-0.0542568	0.0328	0.942621	no
ENST00000487519	ENSG00000108064	TFAM	10:60144781-60158990	CCL244CONTROL1	CCL244R1	OK	0.582196	3.26765	2.48868	2.45904	0.02995	0.942621	no
ENST00000488423	ENSG00000154813	DPH3	3:16014886-16555533	CCL244CONTROL1	CCL244R1	OK	2.519	0.00033167	-12.8908	-0.0849588	0.0093	0.942621	no
ENST00000488609	ENSG00000169241	SLC50A1	1:155107819-155111329	CCL244CONTROL1	CCL244R1	OK	4.73911	0.00120783	-11.938	-0.0673014	0.02025	0.942621	no
ENST00000489277	ENSG00000126698	DNAJC8	1:28525966-28559536	CCL244CONTROL1	CCL244R1	OK	0.000864254	3.28596	11.8926	0.0974775	0.03465	0.942621	no
ENST00000490314	ENSG00000240790	AC073934.6	7:127284470-127292066	CCL244CONTROL1	CCL244R1	OK	1.02825	0	-1.02023548840199	NA	0.03855	0.942621	no
ENST00000490777	ENSG00000175470	PPP2R2D	10:133747954-133773355	CCL244CONTROL1	CCL244R1	OK	2.12148	0.00122861	-10.7538	-0.112932	0.0373	0.942621	no
ENST00000492888	ENSG00000142687	KIAA0319L	1:35899090-36032875	CCL244CONTROL1	CCL244R1	OK	0.00142792	5.30263	11.8586	0.0769669	0.0148	0.942621	no
ENST00000493039	ENSG00000101138	CSTF1	20:54967426-54979518	CCL244CONTROL1	CCL244R1	OK	0.00125479	2.68683	11.0642	0.191378	0.01985	0.942621	no
ENST00000494361	ENSG00000123130	ACOT9	X:23720369-23784592	CCL244CONTROL1	CCL244R1	OK	2.17127	0.00053075	-11.9982	-0.0639388	0.0373	0.942621	no
ENST00000496381	ENSG00000101391	CDK5RAP1	20:31946644-31989367	CCL244CONTROL1	CCL244R1	OK	3.1616	0.00213596	-10.5316	-0.100107	0.0316	0.942621	no
ENST00000497665	ENSG00000165055	METTL2B	7:128095893-128146656	CCL244CONTROL1	CCL244R1	OK	3.53554	0.00321809	-10.1015	-0.170867	0.0317	0.942621	no
ENST00000497712	ENSG00000148153	INIP	9:115446205-115484956	CCL244CONTROL1	CCL244R1	OK	0.00243345	2.22369	9.83574	0.123716	0.03525	0.942621	no
ENST00000498425	ENSG00000147155	EBP	X:48379545-48387104	CCL244CONTROL1	CCL244R1	OK	5.12116	0.00103078	-12.2785	-0.0510034	0.0387	0.942621	no
ENST00000499247	ENSG00000141232	TOB1	17:48939583-48987593	CCL244CONTROL1	CCL244R1	OK	13.6505	4.23228	-1.68945	-2.49668	0.0145	0.942621	no
ENST00000503081	ENSG00000204628	GNB2L1	5:180663908-180699308	CCL244CONTROL1	CCL244R1	OK	0.000923749	18.3991	14.2818	0.0140675	0.04565	0.942621	no
ENST00000503252	ENSG00000153395	LPCAT1	5:1456594-1524092	CCL244CONTROL1	CCL244R1	OK	2.23167	0.0011589	-10.9111	-0.213715	0.03405	0.942621	no
ENST00000503682	ENSG00000138663	COPS4	4:83955599-83996971	CCL244CONTROL1	CCL244R1	OK	1.58179	0.00204497	-9.59527	-0.199602	0.03675	0.942621	no
ENST00000503857	ENSG00000047188	YTHDC2	5:112849379-112930982	CCL244CONTROL1	CCL244R1	OK	2.95766	0.00121419	-11.2502	-0.1794	0.02095	0.942621	no
ENST00000504342	ENSG00000151726	ACSL1	4:185676748-185776905	CCL244CONTROL1	CCL244R1	OK	0.00175895	1.38675	9.62277	0.244646	0.0337	0.942621	no
ENST00000504968	ENSG00000138802	SEC24B	4:110267481-110462052	CCL244CONTROL1	CCL244R1	OK	0.387207	2.23992	2.53227	1.51027	0.02755	0.942621	no
ENST00000505490	ENSG00000183684	ALYREF	17:79845712-79869340	CCL244CONTROL1	CCL244R1	OK	22.5976	126.711	2.4873	2.15181	0.04385	0.942621	no
ENST00000506572	ENSG00000134057	CCNB1	5:68462836-68474072	CCL244CONTROL1	CCL244R1	OK	44.6835	130.426	1.54542	2.09509	0.02865	0.942621	no
ENST00000507773	ENSG00000121073	SLC35B1	17:47778304-47906458	CCL244CONTROL1	CCL244R1	OK	3.9043	0.00202438	-10.9134	-0.16754	0.0301	0.942621	no
ENST00000508530	ENSG00000077380	DYNC1I2	2:172543918-172604930	CCL244CONTROL1	CCL244R1	OK	1.39855	0.00087045	-10.6499	-0.144136	0.02365	0.942621	no
ENST00000508798	ENSG00000168785	TSPAN5	4:99391517-99579780	CCL244CONTROL1	CCL244R1	OK	1.64195	0.000358574	-12.1608	-0.0899326	0.011	0.942621	no
ENST00000509537	ENSG00000083857	FAT1	4:187506061-187647876	CCL244CONTROL1	CCL244R1	OK	13.1698	1.67436e-139	-464.724	-1.46229e-136	0.0428	0.942621	no
ENST00000509867	ENSG00000132466	ANKRD17	4:73939092-74184383	CCL244CONTROL1	CCL244R1	OK	1.04311	0.000144622	-12.8163	-0.0993747	0.02095	0.942621	no
ENST00000510361	ENSG00000073578	SDHA	5:218355-256815	CCL244CONTROL1	CCL244R1	OK	0.000166674	3.76024	14.4615	0.0318222	0.02845	0.942621	no
ENST00000510377	ENSG00000170185	USP38	4:144106069-144144983	CCL244CONTROL1	CCL244R1	OK	24.9893	9.43129	-1.40579	-2.04553	0.03625	0.942621	no
ENST00000510505	ENSG00000249614	RP11-703G6.1	4:104882772-104958080	CCL244CONTROL1	CCL244R1	OK	26.7693	11.0757	-1.27318	-2.01041	0.04305	0.942621	no
ENST00000512344	ENSG00000198189	HSD17B11	4:88224940-88312538	CCL244CONTROL1	CCL244R1	OK	4.36058	0.00475954	-9.83948	-0.139457	0.04815	0.942621	no
ENST00000513247	ENSG00000162222	TTC9C	11:62495540-62507765	CCL244CONTROL1	CCL244R1	OK	0.000924491	1.83581	10.9555	0.110417	0.01645	0.942621	no
ENST00000513709	ENSG00000145536	ADAMTS16	5:5140442-5320417	CCL244CONTROL1	CCL244R1	OK	2.54291	0	-1.82493481736059	NA	0.0409	0.942621	no
ENST00000514396	ENSG00000251595	ABCA11P	4:419223-492945	CCL244CONTROL1	CCL244R1	OK	1.24812	0.00132217	-9.88263	-0.108227	0.0498	0.942621	no
ENST00000514838	ENSG00000152359	POC5	5:74969948-75013313	CCL244CONTROL1	CCL244R1	OK	0.454035	4.00275	3.14012	2.57566	0.04655	0.942621	no
ENST00000515153	ENSG00000251361	CTD-2091N23.1	5:92355368-92404375	CCL244CONTROL1	CCL244R1	OK	0	1.22862	1.15615064492809	NA	0.00945	0.942621	no
ENST00000515682	ENSG00000125089	SH3TC1	4:8183798-8243530	CCL244CONTROL1	CCL244R1	OK	1.58038	0.00132243	-10.2229	-0.265257	0.04875	0.942621	no
ENST00000515708	ENSG00000048140	TSPAN17	5:176074387-176086058	CCL244CONTROL1	CCL244R1	OK	3.6424	0.000532922	-12.7387	-0.0994353	0.012	0.942621	no
ENST00000515804	ENSG00000164331	ANKRA2	5:72848159-72877794	CCL244CONTROL1	CCL244R1	OK	0.000863406	3.11192	11.8155	0.0758521	0.03365	0.942621	no
ENST00000515896	ENSG00000251705	RNA5-8SP6	Y:10037763-10037915	CCL244CONTROL1	CCL244R1	OK	31121.5	1617.74	-4.26587	-6.49002	5e-05	0.122986	no
ENST00000517689	ENSG00000253138	LINC00967	8:67104327-67109921	CCL244CONTROL1	CCL244R1	OK	1.1234	0	-1.08637616759694	NA	0.0043	0.942621	no
ENST00000519148	ENSG00000184428	TOP1MT	8:144386553-144442149	CCL244CONTROL1	CCL244R1	OK	2.01298	0.0031036	-9.34117	-0.327478	0.04735	0.942621	no
ENST00000519286	ENSG00000183137	CEP57L1	6:109416312-109485135	CCL244CONTROL1	CCL244R1	OK	0.00419883	1.75544	8.70763	0.18921	0.0377	0.942621	no
ENST00000519523	ENSG00000104231	ZFAND1	8:82613565-82671750	CCL244CONTROL1	CCL244R1	OK	5.94696	0.00595952	-9.96274	-0.199726	0.0451	0.942621	no
ENST00000520004	ENSG00000182319	SGK223	8:8175257-8244008	CCL244CONTROL1	CCL244R1	OK	9.4579	2.88167	-1.71462	-2.86964	0.0049	0.942621	no
ENST00000520586	ENSG00000204764	RANBP17	5:170288873-170727019	CCL244CONTROL1	CCL244R1	OK	5.43499	0.00510902	-10.055	-0.140074	0.04825	0.942621	no
ENST00000520931	ENSG00000145901	TNIP1	5:150409505-150473138	CCL244CONTROL1	CCL244R1	OK	7.68688	0.00201179	-11.8997	-0.201206	0.04545	0.942621	no
ENST00000520969	ENSG00000161013	MGAT4B	5:179224596-179334859	CCL244CONTROL1	CCL244R1	OK	3.51941	5.89121e-06	-19.1883	-0.000685628	0.04475	0.942621	no
ENST00000521403	ENSG00000253603	CTA-397H3.3	8:56987150-56987833	CCL244CONTROL1	CCL244R1	OK	0	1.95194	1.56166339803037	NA	0.0034	0.942621	no
ENST00000521496	ENSG00000156802	ATAD2	8:124332089-124428590	CCL244CONTROL1	CCL244R1	OK	1.33002	7.34048	2.46442	1.93302	0.0427	0.942621	no
ENST00000521982	ENSG00000170791	CHCHD7	8:57124244-57131357	CCL244CONTROL1	CCL244R1	OK	4.56718	0.00729248	-9.29068	-0.160851	0.0281	0.942621	no
ENST00000522405	ENSG00000173566	NUDT18	8:21964382-21966932	CCL244CONTROL1	CCL244R1	OK	2.14308	0.00303462	-9.46395	-0.252669	0.03715	0.942621	no
ENST00000522563	ENSG00000156831	NSMCE2	8:126036501-126379362	CCL244CONTROL1	CCL244R1	OK	7.28835	0.00163335	-12.1235	-0.112174	0.01565	0.942621	no
ENST00000522778	ENSG00000253103	RP11-946L20.4	8:112111189-112248432	CCL244CONTROL1	CCL244R1	OK	40.7221	17.1331	-1.24903	-1.95604	0.0479	0.942621	no
ENST00000523944	ENSG00000104738	MCM4	8:48872744-48890720	CCL244CONTROL1	CCL244R1	OK	1.41765	13.5786	3.25977	2.76201	0.02195	0.942621	no
ENST00000525773	ENSG00000178685	PARP10	8:145051320-145101933	CCL244CONTROL1	CCL244R1	OK	1.11174	0.00112748	-9.9455	-0.243433	0.0329	0.942621	no
ENST00000526707	ENSG00000184014	DENND5A	11:9160371-9286937	CCL244CONTROL1	CCL244R1	OK	2.70871	0.000365454	-12.8556	-0.0847506	0.00725	0.942621	no
ENST00000527711	ENSG00000111907	TPD52L1	6:125440194-125623282	CCL244CONTROL1	CCL244R1	OK	0.000711426	6.1563	13.0791	0.0503116	0.01265	0.942621	no
ENST00000528311	ENSG00000116171	SCP2	1:53392900-53517375	CCL244CONTROL1	CCL244R1	OK	0.00194331	3.39625	10.7712	0.240503	0.03335	0.942621	no
ENST00000529064	ENSG00000104522	TSTA3	8:144694787-144700218	CCL244CONTROL1	CCL244R1	OK	0.00322792	6.23736	10.9161	0.268145	0.032	0.942621	no
ENST00000529285	ENSG00000149273	RPS3	11:75110529-75133324	CCL244CONTROL1	CCL244R1	OK	12.7575	1.99056e-08	-29.2555	-1.3749e-06	0.03045	0.942621	no
ENST00000530019	ENSG00000167996	FTH1	11:61717292-61735132	CCL244CONTROL1	CCL244R1	OK	0.00871903	35.3533	11.9854	0.0743871	0.0317	0.942621	no
ENST00000530165	ENSG00000254986	DPP3	11:66234215-66313709	CCL244CONTROL1	CCL244R1	OK	0.000176329	4.24767	14.5561	0.0356793	0.04325	0.942621	no
ENST00000530742	ENSG00000113282	CLINT1	5:157212750-157286183	CCL244CONTROL1	CCL244R1	OK	0.000929107	3.07923	11.6944	0.231592	0.02815	0.942621	no
ENST00000530927	ENSG00000112699	GMDS	6:1453542-2245926	CCL244CONTROL1	CCL244R1	OK	3.25571	0.00148202	-11.1012	-0.138163	0.03525	0.942621	no
ENST00000531217	ENSG00000110080	ST3GAL4	11:126225534-126875953	CCL244CONTROL1	CCL244R1	OK	4.4556	0.0032877	-10.4043	-0.35794	0.0449	0.942621	no
ENST00000532275	ENSG00000166483	WEE1	11:9595227-9615004	CCL244CONTROL1	CCL244R1	OK	3.44443	0.00542207	-9.3112	-0.130132	0.04715	0.942621	no
ENST00000532437	ENSG00000149115	TNKS1BP1	11:57067111-57092426	CCL244CONTROL1	CCL244R1	OK	1.16929	0.000191541	-12.5757	-0.0939608	0.02135	0.942621	no
ENST00000532947	ENSG00000255322	RP11-22P4.1	11:28373636-28548588	CCL244CONTROL1	CCL244R1	OK	1.24237	0	-1.16502434822513	NA	0.00875	0.942621	no
ENST00000533567	ENSG00000133112	TPT1	13:45911007-45966224	CCL244CONTROL1	CCL244R1	OK	7.98137	0.000951511	-13.0341	-0.00952068	0.03885	0.942621	no
ENST00000533683	ENSG00000141858	SAMD1	19:14198651-14201848	CCL244CONTROL1	CCL244R1	OK	4.13495	11.3936	1.46229	2.0174	0.0419	0.942621	no
ENST00000535508	ENSG00000008838	MED24	17:38175349-38256978	CCL244CONTROL1	CCL244R1	OK	0.00141912	2.09323	10.5265	0.224365	0.04895	0.942621	no
ENST00000535911	ENSG00000256155	RP11-277P12.9	12:10511062-10513644	CCL244CONTROL1	CCL244R1	OK	1.33901	0	-1.22589802967648	NA	0.01195	0.942621	no
ENST00000536218	ENSG00000105486	LIG1	19:48618701-48673860	CCL244CONTROL1	CCL244R1	OK	0.000665334	8.11116	13.5735	0.164443	0.0181	0.942621	no
ENST00000536468	ENSG00000127191	TRAF2	9:139776363-139821059	CCL244CONTROL1	CCL244R1	OK	0.510522	4.92687	3.27063	1.88375	0.04225	0.942621	no
ENST00000536817	ENSG00000117528	ABCD3	1:94883932-94984222	CCL244CONTROL1	CCL244R1	OK	0.000263793	3.27864	13.6014	0.0554503	0.0145	0.942621	no
ENST00000537919	ENSG00000131473	ACLY	17:40021807-40086887	CCL244CONTROL1	CCL244R1	OK	0.000192451	9.04188	15.5198	0.0561702	0.00645	0.942621	no
ENST00000538315	ENSG00000061794	MRPS35	12:27863705-27909228	CCL244CONTROL1	CCL244R1	OK	8.44682	0.00234275	-11.816	-0.200907	0.028	0.942621	no
ENST00000538426	ENSG00000167770	OTUB1	11:63742078-63933578	CCL244CONTROL1	CCL244R1	OK	8.39827	0.000902292	-13.1842	-0.0871402	0.0132	0.942621	no
ENST00000539068	ENSG00000096060	FKBP5	6:35541361-35704724	CCL244CONTROL1	CCL244R1	OK	0.000642689	1.91503	11.541	0.182398	0.0278	0.942621	no
ENST00000539745	ENSG00000197837	HIST4H4	12:14656594-14924065	CCL244CONTROL1	CCL244R1	OK	118.749	475.213	2.00066	3.05294	0.0021	0.942621	no
ENST00000539896	ENSG00000169403	PTAFR	1:28473676-28520447	CCL244CONTROL1	CCL244R1	OK	3.02446	0.590953	-2.35556	-2.70806	0.01425	0.942621	no
ENST00000540000	ENSG00000086589	RBM22	5:150070355-150080669	CCL244CONTROL1	CCL244R1	OK	0.000879026	3.66872	12.0271	0.138139	0.0185	0.942621	no
ENST00000540001	ENSG00000058804	NDC1	1:54231132-54304533	CCL244CONTROL1	CCL244R1	OK	2.97859	10.8316	1.86255	2.17424	0.0364	0.942621	no
ENST00000540120	ENSG00000104856	RELB	19:45504687-45541452	CCL244CONTROL1	CCL244R1	OK	8.91422	0.00236462	-11.8803	-0.278683	0.04475	0.942621	no
ENST00000540746	ENSG00000257103	LSM14A	19:34663408-34720420	CCL244CONTROL1	CCL244R1	OK	0.000393621	2.51087	12.6391	0.065816	0.0051	0.942621	no
ENST00000541235	ENSG00000132824	SERINC3	20:43124861-43150750	CCL244CONTROL1	CCL244R1	OK	3.94218	0.000827108	-12.2186	-0.103249	0.0156	0.942621	no
ENST00000541987	ENSG00000117569	PTBP2	1:97187220-97289294	CCL244CONTROL1	CCL244R1	OK	1.68481	0.0008043	-11.0326	-0.090178	0.01555	0.942621	no
ENST00000542140	ENSG00000076053	RBM7	11:114262164-114321001	CCL244CONTROL1	CCL244R1	OK	1.94688	0.000864972	-11.1362	-0.111479	0.02845	0.942621	no
ENST00000542342	ENSG00000133195	SLC39A11	17:70642087-71088851	CCL244CONTROL1	CCL244R1	OK	0.000434083	3.62232	13.0267	0.0978249	0.0092	0.942621	no
ENST00000542467	ENSG00000162341	TPCN2	11:68816364-68858431	CCL244CONTROL1	CCL244R1	OK	1.37452	0.000914947	-10.553	-0.117774	0.0153	0.942621	no
ENST00000542472	ENSG00000010292	NCAPD2	12:6601149-6641121	CCL244CONTROL1	CCL244R1	OK	9.70074	6.07107e-07	-23.9296	-2.38521e-05	0.0462	0.942621	no
ENST00000543218	ENSG00000176871	WSB2	12:118451392-118500235	CCL244CONTROL1	CCL244R1	OK	0.00285018	10.6275	11.8645	0.118898	0.02275	0.942621	no
ENST00000543365	ENSG00000180448	HMHA1	19:1065921-1095598	CCL244CONTROL1	CCL244R1	OK	0.000121256	2.59304	14.3843	0.0419837	0.00575	0.942621	no
ENST00000543625	ENSG00000132109	TRIM21	11:4406126-4414926	CCL244CONTROL1	CCL244R1	OK	1.39722	9.58184	2.77775	2.51223	0.04835	0.942621	no
ENST00000543927	ENSG00000130489	SCO2	22:50961996-50971009	CCL244CONTROL1	CCL244R1	OK	0.00257776	3.31359	10.3281	0.153319	0.0382	0.942621	no
ENST00000544005	ENSG00000089737	DDX24	14:94517265-94547591	CCL244CONTROL1	CCL244R1	OK	4.72093	0.000704985	-12.7092	-0.122292	0.0209	0.942621	no
ENST00000544113	ENSG00000078124	ACER3	11:76571910-76737841	CCL244CONTROL1	CCL244R1	OK	0.000547127	1.987	11.8264	0.121858	0.01385	0.942621	no
ENST00000544359	ENSG00000169299	PGM2	4:37828254-37864558	CCL244CONTROL1	CCL244R1	OK	2.85846	0.00341699	-9.7083	-0.324852	0.04315	0.942621	no
ENST00000544445	ENSG00000256889	AC093847.1	4:92947430-92951863	CCL244CONTROL1	CCL244R1	OK	0	13.6587	3.87368525929259	NA	0.0299	0.942621	no
ENST00000544494	ENSG00000132004	FBXW9	19:12798866-12807457	CCL244CONTROL1	CCL244R1	OK	2.43457	0.00200643	-10.2448	-0.156877	0.01865	0.942621	no
ENST00000544716	ENSG00000051382	PIK3CB	3:138372859-138553780	CCL244CONTROL1	CCL244R1	OK	0.00169493	3.02589	10.8019	0.261604	0.03995	0.942621	no
ENST00000545212	ENSG00000175567	UCP2	11:73685711-73694352	CCL244CONTROL1	CCL244R1	OK	6.46979	0.0165071	-8.61449	-0.180492	0.03	0.942621	no
ENST00000545834	ENSG00000178921	PFAS	17:8128138-8173809	CCL244CONTROL1	CCL244R1	OK	0.00123247	2.07798	10.7194	0.208988	0.0464	0.942621	no
ENST00000546561	ENSG00000127324	TSPAN8	12:71518864-71980090	CCL244CONTROL1	CCL244R1	OK	53.779	9.79835	-2.45643	-2.43692	0.02155	0.942621	no
ENST00000546656	ENSG00000111057	KRT18	12:53290970-53346686	CCL244CONTROL1	CCL244R1	OK	14.3265	0.00492953	-11.5049	-0.00480942	0.0405	0.942621	no
ENST00000547176	ENSG00000170421	KRT8	12:53290970-53346686	CCL244CONTROL1	CCL244R1	OK	33.2886	2.10671e-45	-153.469	-1.33002e-43	0.0448	0.942621	no
ENST00000549140	ENSG00000258332	RP11-711C17.2	12:74432865-74439608	CCL244CONTROL1	CCL244R1	OK	1.23692	0	-1.16151366155256	NA	0.0195	0.942621	no
ENST00000549283	ENSG00000120805	ARL1	12:101786897-101801598	CCL244CONTROL1	CCL244R1	OK	20.3298	0.00201239	-13.3024	-0.0661065	0.01425	0.942621	no
ENST00000549362	ENSG00000155313	USP25	21:17048708-17252377	CCL244CONTROL1	CCL244R1	OK	10.3514	0.00487733	-11.0514	-0.147711	0.0219	0.942621	no
ENST00000549447	ENSG00000183160	TMEM119	12:108983621-108992096	CCL244CONTROL1	CCL244R1	OK	0.165084	1.42385	3.10852	1.19309	0.04935	0.942621	no
ENST00000549621	ENSG00000139405	C12orf52	12:113623330-113630173	CCL244CONTROL1	CCL244R1	OK	2.04311	0.000318737	-12.6461	-0.0502894	0.04455	0.942621	no
ENST00000552351	ENSG00000111666	CHPT1	12:102089779-102137918	CCL244CONTROL1	CCL244R1	OK	0.00293972	12.8352	12.0921	0.318795	0.03565	0.942621	no
ENST00000552516	ENSG00000106799	TGFBR1	9:101866319-101916474	CCL244CONTROL1	CCL244R1	OK	0.000845338	2.66938	11.6247	0.381987	0.04485	0.942621	no
ENST00000553999	ENSG00000100644	HIF1A	14:62147758-62263146	CCL244CONTROL1	CCL244R1	OK	7.80735	0.00322446	-11.2416	-0.101801	0.028	0.942621	no
ENST00000554308	ENSG00000100796	SMEK1	14:91923954-91976898	CCL244CONTROL1	CCL244R1	OK	2.15543	0.000315696	-12.7372	-0.0630981	0.01105	0.942621	no
ENST00000555330	ENSG00000119682	AREL1	14:75119879-75179818	CCL244CONTROL1	CCL244R1	OK	0.000814162	2.38023	11.5135	0.295874	0.0382	0.942621	no
ENST00000555423	ENSG00000087299	L2HGDH	14:50704280-50883179	CCL244CONTROL1	CCL244R1	OK	0.00133079	4.74474	11.7998	0.0680743	0.02495	0.942621	no
ENST00000555803	ENSG00000100558	PLEK2	14:67853699-67878917	CCL244CONTROL1	CCL244R1	OK	5.98347	0.00253353	-11.2056	-0.0724173	0.0237	0.942621	no
ENST00000556029	ENSG00000120802	TMPO	12:98906750-98944157	CCL244CONTROL1	CCL244R1	OK	7.45284	27.8189	1.9002	2.07493	0.04685	0.942621	no
ENST00000556603	ENSG00000100605	ITPK1	14:93403258-93582665	CCL244CONTROL1	CCL244R1	OK	3.75842	0.00036984	-13.3109	-0.0992585	0.00995	0.942621	no
ENST00000556683	ENSG00000139921	TMX1	14:51706879-51722759	CCL244CONTROL1	CCL244R1	OK	0.000479456	8.29945	14.0793	0.0877009	0.00725	0.942621	no
ENST00000556813	ENSG00000100519	PSMC6	14:53173889-53195305	CCL244CONTROL1	CCL244R1	OK	6.36257	0.0017186	-11.8542	-0.0805775	0.0095	0.942621	no
ENST00000556814	ENSG00000119616	FCF1	14:75179846-75203394	CCL244CONTROL1	CCL244R1	OK	0.00851022	4.82958	9.14849	0.194829	0.048	0.942621	no
ENST00000556825	ENSG00000182199	SHMT2	12:57623109-57634527	CCL244CONTROL1	CCL244R1	OK	0.000567593	7.36633	13.6638	0.105909	0.04235	0.942621	no
ENST00000559098	ENSG00000022976	ZNF839	14:102783713-102829253	CCL244CONTROL1	CCL244R1	OK	0.000805506	2.27344	11.4627	0.166803	0.0198	0.942621	no
ENST00000559835	ENSG00000086666	ZFAND6	15:80351909-80430735	CCL244CONTROL1	CCL244R1	OK	0.000388584	9.83545	14.6275	0.0479713	0.00395	0.942621	no
ENST00000560217	ENSG00000041357	PSMA4	15:78832746-78841604	CCL244CONTROL1	CCL244R1	OK	10.1283	0.000334976	-14.884	-0.0250983	0.03085	0.942621	no
ENST00000561320	ENSG00000259380	RP11-346D14.1	15:38431795-38519136	CCL244CONTROL1	CCL244R1	OK	41.0822	15.6464	-1.39269	-2.38218	0.01945	0.942621	no
ENST00000561435	ENSG00000092010	PSME1	14:24605366-24610797	CCL244CONTROL1	CCL244R1	OK	9.06228	0.00174915	-12.339	-0.108786	0.01675	0.942621	no
ENST00000562057	ENSG00000166145	SPINT1	15:41128005-41150405	CCL244CONTROL1	CCL244R1	OK	32.3333	6.83219	-2.2426	-2.27872	0.0289	0.942621	no
ENST00000562103	ENSG00000167962	ZNF598	16:2047654-2059824	CCL244CONTROL1	CCL244R1	OK	2.08914	0.000998776	-11.0305	-0.187951	0.01685	0.942621	no
ENST00000562471	ENSG00000261068	RP11-7K24.3	6:42059975-42061997	CCL244CONTROL1	CCL244R1	OK	3.04589	0.571104	-2.41504	-2.88783	0.01585	0.942621	no
ENST00000564650	ENSG00000261643	RP11-529E10.6	4:3505323-3506184	CCL244CONTROL1	CCL244R1	OK	1.09722	0	-1.06847820919847	NA	0.00385	0.942621	no
ENST00000564804	ENSG00000140682	TGFB1I1	16:31482905-31489281	CCL244CONTROL1	CCL244R1	OK	0.00378684	1.60203	8.72469	0.316817	0.04385	0.942621	no
ENST00000565154	ENSG00000067225	PKM	15:72491369-72524164	CCL244CONTROL1	CCL244R1	OK	3.8312e-12	2.37	39.1702	1.83465e-09	0.0409	0.942621	no
ENST00000565373	ENSG00000140474	ULK3	15:75128456-75135687	CCL244CONTROL1	CCL244R1	OK	0.00855199	5.10275	9.2208	0.19197	0.0377	0.942621	no
ENST00000565500	ENSG00000103994	ZNF106	15:42705020-42783321	CCL244CONTROL1	CCL244R1	OK	1.46047	0.000196314	-12.861	-0.0776095	0.0158	0.942621	no
ENST00000566113	ENSG00000103502	CDIPT	16:29262828-30366682	CCL244CONTROL1	CCL244R1	OK	1.15078e-17	3.81945	58.2035	6.67533e-15	0.0357	0.942621	no
ENST00000566733	ENSG00000260604	RP1-140K8.5	6:3898391-3913082	CCL244CONTROL1	CCL244R1	OK	1.69286	0.454021	-1.89863	-2.70975	0.00845	0.942621	no
ENST00000567118	ENSG00000067225	PKM	15:72491369-72524164	CCL244CONTROL1	CCL244R1	OK	6.36703	1.55119e-07	-25.2907	-5.4615e-05	0.0399	0.942621	no
ENST00000567999	ENSG00000140995	DEF8	16:90014332-90034468	CCL244CONTROL1	CCL244R1	OK	0.00334593	11.1648	11.7043	0.099892	0.02365	0.942621	no
ENST00000568674	ENSG00000090238	YPEL3	16:29262828-30366682	CCL244CONTROL1	CCL244R1	OK	14.1659	0	-3.92275921019263	NA	0.0224	0.942621	no
ENST00000568733	ENSG00000013374	NUB1	7:151038784-151112174	CCL244CONTROL1	CCL244R1	OK	1.24895	0.000413211	-11.5616	-0.0974893	0.01445	0.942621	no
ENST00000568816	ENSG00000104164	BLOC1S6	15:45879320-45983492	CCL244CONTROL1	CCL244R1	OK	1.3657	0.000334604	-11.9949	-0.103764	0.01505	0.942621	no
ENST00000569510	ENSG00000156218	ADAMTSL3	15:84322837-84708594	CCL244CONTROL1	CCL244R1	OK	12.8967	5.12213	-1.33218	-2.21695	0.0261	0.942621	no
ENST00000569693	ENSG00000159322	ADPGK	15:73043709-73090540	CCL244CONTROL1	CCL244R1	OK	0.000562106	1.49107	11.3732	0.0701729	0.04985	0.942621	no
ENST00000569798	ENSG00000149925	ALDOA	16:29262828-30366682	CCL244CONTROL1	CCL244R1	OK	2.44735	1.51351e-14	-47.2003	-6.28607e-12	0.04745	0.942621	no
ENST00000571721	ENSG00000184009	ACTG1	17:79476996-79494802	CCL244CONTROL1	CCL244R1	OK	9.09598e-83	6.90255	275.322	1.0381e-79	0.0332	0.942621	no
ENST00000571722	ENSG00000262074	SNORD3B-2	17:18966761-18967449	CCL244CONTROL1	CCL244R1	OK	17.6055	54.1804	1.62174	2.61626	0.01195	0.942621	no
ENST00000573283	ENSG00000184009	ACTG1	17:79476996-79494802	CCL244CONTROL1	CCL244R1	OK	5.4558	0.00140759	-11.9204	-0.0197106	0.0482	0.942621	no
ENST00000573780	ENSG00000181031	RPH3AL	17:62292-236045	CCL244CONTROL1	CCL244R1	OK	4.70171	0.00501044	-9.87403	-0.110412	0.0363	0.942621	no
ENST00000574151	ENSG00000103145	HCFC1R1	16:3072620-3089134	CCL244CONTROL1	CCL244R1	OK	11.6538	0.00854653	-10.4132	-0.177562	0.0469	0.942621	no
ENST00000575087	ENSG00000184009	ACTG1	17:79476996-79494802	CCL244CONTROL1	CCL244R1	OK	7.65424e-13	5.48867	42.7053	3.98955e-10	0.0311	0.942621	no
ENST00000575784	ENSG00000091640	SPAG7	17:4862520-4871167	CCL244CONTROL1	CCL244R1	OK	5.19986	0.00253793	-11.0006	-0.0931844	0.03775	0.942621	no
ENST00000577427	ENSG00000133028	SCO1	17:10583653-10718481	CCL244CONTROL1	CCL244R1	OK	0.00145436	2.62162	10.8159	0.149275	0.03375	0.942621	no
ENST00000577853	ENSG00000264207	RP11-196G18.23	1:149802875-149804109	CCL244CONTROL1	CCL244R1	OK	1.05097	3.86086	1.8772	2.19477	0.04195	0.942621	no
ENST00000577988	ENSG00000265185	SNORD3B-1	17:18965224-18965807	CCL244CONTROL1	CCL244R1	OK	15.1825	40.9216	1.43045	2.16367	0.0344	0.942621	no
ENST00000578892	ENSG00000108622	ICAM2	17:62072977-62097994	CCL244CONTROL1	CCL244R1	OK	2.86348	0.00249872	-10.1624	-0.14711	0.02415	0.942621	no
ENST00000581093	ENSG00000161956	SENP3	17:7465191-7536700	CCL244CONTROL1	CCL244R1	OK	3.09462e-06	8.75888	21.4326	0.000130944	0.04085	0.942621	no
ENST00000581256	ENSG00000265039	AC107016.2	12:53290970-53346686	CCL244CONTROL1	CCL244R1	OK	5.84443e-32	5757.76	116.246	7.30589e-32	0.02935	0.942621	no
ENST00000581380	ENSG00000129255	MPDU1	17:7465191-7536700	CCL244CONTROL1	CCL244R1	OK	1.79181e-06	15.9975	23.0899	7.1295e-05	0.034	0.942621	no
ENST00000583629	ENSG00000264015	RP11-176N18.2	18:75133574-75278179	CCL244CONTROL1	CCL244R1	OK	1.33901	0	-1.22589802967648	NA	0.012	0.942621	no
ENST00000584509	ENSG00000264964	RP11-888D10.3	18:9290914-9334462	CCL244CONTROL1	CCL244R1	OK	1.2908	0	-1.19585150857564	NA	0.02995	0.942621	no
ENST00000584697	ENSG00000264691	AP001427.1	21:39323727-39493454	CCL244CONTROL1	CCL244R1	OK	114.269	0	-6.84886076209123	NA	0.04855	0.942621	no
ENST00000586094	ENSG00000167635	ZNF146	19:36673187-36737159	CCL244CONTROL1	CCL244R1	OK	0.0016069	7.49586	12.1876	0.0482299	0.02305	0.942621	no
ENST00000587391	ENSG00000075702	WDR62	19:36545782-36596008	CCL244CONTROL1	CCL244R1	OK	0.885899	3.14254	1.82671	2.33	0.0289	0.942621	no
ENST00000587985	ENSG00000064545	TMEM161A	19:19229977-19249322	CCL244CONTROL1	CCL244R1	OK	3.16966	0.00160903	-10.9439	-0.185383	0.02935	0.942621	no
ENST00000588147	ENSG00000105048	TNNT1	19:55644161-55660722	CCL244CONTROL1	CCL244R1	OK	16.1264	0.00527874	-11.5769	-0.118979	0.02065	0.942621	no
ENST00000588826	ENSG00000179262	RAD23A	19:13056668-13064456	CCL244CONTROL1	CCL244R1	OK	11.6053	0.00118233	-13.2609	-0.0670118	0.01595	0.942621	no
ENST00000589010	ENSG00000267696	CTB-151G24.1	19:28129390-28137391	CCL244CONTROL1	CCL244R1	OK	6.07879	0	-2.82350277694858	NA	0.00325	0.942621	no
ENST00000589378	ENSG00000105289	TJP3	19:3708106-3750811	CCL244CONTROL1	CCL244R1	OK	37.4632	13.4398	-1.47896	-2.34332	0.0186	0.942621	no
ENST00000590138	ENSG00000141401	IMPA2	18:11981023-12030876	CCL244CONTROL1	CCL244R1	OK	2.69775	0.00101298	-11.3789	-0.0541922	0.0401	0.942621	no
ENST00000591455	ENSG00000108669	CYTH1	17:76670129-76778379	CCL244CONTROL1	CCL244R1	OK	0.00101984	1.60652	10.6214	0.226613	0.032	0.942621	no
ENST00000592576	ENSG00000108883	EFTUD2	17:42923720-42994305	CCL244CONTROL1	CCL244R1	OK	1.83743	11.9952	2.7067	1.65685	0.01685	0.942621	no
ENST00000592810	ENSG00000166289	PLEKHF1	19:30155962-30166364	CCL244CONTROL1	CCL244R1	OK	1.06365	0.00262006	-8.66521	-0.177876	0.02945	0.942621	no
ENST00000593194	ENSG00000105048	TNNT1	19:55644161-55660722	CCL244CONTROL1	CCL244R1	OK	0.0060451	26.4285	12.094	0.182014	0.02915	0.942621	no
ENST00000595196	ENSG00000105323	HNRNPUL1	19:41768400-41930910	CCL244CONTROL1	CCL244R1	OK	0.000487938	4.30961	13.1086	0.0871697	0.01275	0.942621	no
ENST00000597896	ENSG00000077463	SIRT6	19:4174105-4182601	CCL244CONTROL1	CCL244R1	OK	1.63728	0.00210307	-9.60458	-0.0856413	0.0479	0.942621	no
ENST00000599213	ENSG00000063322	MED29	19:39881942-39891277	CCL244CONTROL1	CCL244R1	OK	1.33445	0.00110027	-10.2442	-0.174913	0.04225	0.942621	no
ENST00000600292	ENSG00000105404	RABAC1	19:42460832-42463542	CCL244CONTROL1	CCL244R1	OK	0.00184155	5.93042	11.653	0.0656591	0.03475	0.942621	no
ENST00000600573	ENSG00000039650	PNKP	19:50364460-50371166	CCL244CONTROL1	CCL244R1	OK	0.00182018	3.80277	11.0287	0.190637	0.02585	0.942621	no
ENST00000601692	ENSG00000267874	CTD-2527I21.9	19:35521587-35531352	CCL244CONTROL1	CCL244R1	OK	36.7968	3886.96	6.72292	8.55555	5e-05	0.122986	no
ENST00000602023	ENSG00000182141	ZNF708	19:21473947-21512227	CCL244CONTROL1	CCL244R1	OK	0.00471264	3.38255	9.48736	0.117682	0.0369	0.942621	no
ENST00000602193	ENSG00000118162	KPTN	19:47978400-47987525	CCL244CONTROL1	CCL244R1	OK	0.00942799	4.2678	8.82233	0.217748	0.0429	0.942621	no
ENST00000602332	ENSG00000269962	RP13-238F13.5	10:126133807-126134344	CCL244CONTROL1	CCL244R1	OK	0	1.03424	1.02448989865651	NA	0.0293	0.942621	no
ENST00000602795	ENSG00000101158	NELFCD	20:57556262-57570188	CCL244CONTROL1	CCL244R1	OK	0.000796759	4.4921	12.461	0.141645	0.01435	0.942621	no
ENST00000604014	ENSG00000270761	RP11-385F7.1	6:47444978-47445308	CCL244CONTROL1	CCL244R1	OK	2.79059	0	-1.92242241932708	NA	0.0271	0.942621	no
ENST00000604729	ENSG00000214655	ZSWIM8	10:75545334-75571589	CCL244CONTROL1	CCL244R1	OK	2.40834	0.000300062	-12.9705	-0.155067	0.0165	0.942621	no
ENST00000606935	ENSG00000110811	LEPREL2	12:6930710-6949018	CCL244CONTROL1	CCL244R1	OK	0.00160005	3.57112	11.124	0.242451	0.0282	0.942621	no
ENST00000607273	ENSG00000146143	PRIM2	6:57179602-57513375	CCL244CONTROL1	CCL244R1	OK	2.51281	7.87829	1.64858	2.14707	0.04225	0.942621	no
ENST00000607956	ENSG00000272644	RP11-33O4.1	2:219934075-219934531	CCL244CONTROL1	CCL244R1	OK	0	1.36405	1.24126054904726	NA	0.0293	0.942621	no
ENST00000609038	ENSG00000273342	KB-1440D3.14	22:21995132-21995573	CCL244CONTROL1	CCL244R1	OK	0	1.44966	1.29258152459402	NA	0.0293	0.942621	no
ENST00000609440	ENSG00000272795	RP11-602N24.3	4:110736202-110736566	CCL244CONTROL1	CCL244R1	OK	0	2.13274	1.64742503901129	NA	0.0293	0.942621	no
ENST00000610130	ENSG00000273190	RP11-255C15.4	3:179055909-179056371	CCL244CONTROL1	CCL244R1	OK	0	1.33257	1.22192037674157	NA	0.0293	0.942621	no
ENST00000610153	ENSG00000118518	RNF146	6:127587754-127609712	CCL244CONTROL1	CCL244R1	OK	1.70173	0.00203237	-9.70962	-0.250053	0.0331	0.942621	no
NONHSAG002039	NONHSAG002039	-	1:90453271-90453503	CCL244CONTROL1	CCL244R1	OK	0	7.26265	3.04660455751798	NA	0.0292	0.942621	no
NONHSAG005562	NONHSAG005562	-	10:32281017-32281309	CCL244CONTROL1	CCL244R1	OK	13.4312	44.1528	1.71692	2.07661	0.04455	0.942621	no
NONHSAG006661	NONHSAG006661	-	10:101369043-101369286	CCL244CONTROL1	CCL244R1	OK	0	5.94082	2.79510611526022	NA	0.0357	0.942621	no
NONHSAG006916	NONHSAG006916	-	10:116183530-116183826	CCL244CONTROL1	CCL244R1	OK	0	3.38617	2.13296172934028	NA	0.0344	0.942621	no
NONHSAG011573	NONHSAG011573	-	12:66686462-66686767	CCL244CONTROL1	CCL244R1	OK	2.79361	0	-1.92357137089845	NA	0.0435	0.942621	no
NONHSAG011992	NONHSAG011992	-	12:96495730-96496027	CCL244CONTROL1	CCL244R1	OK	0	3.35232	2.12178463320614	NA	0.03295	0.942621	no
NONHSAG014151	NONHSAG014151	-	13:109882818-109960133	CCL244CONTROL1	CCL244R1	OK	1.56663	0.254588	-2.62143	-3.16385	0.00785	0.942621	no
NONHSAG026181	NONHSAG026181	-	19:49187291-49187563	CCL244CONTROL1	CCL244R1	OK	6.12494	0	-2.83287786510272	NA	0.0135	0.942621	no
NONHSAG026195	NONHSAG026195	-	19:49379368-49379658	CCL244CONTROL1	CCL244R1	OK	3.85893	0	-2.28063864847078	NA	0.02885	0.942621	no
NONHSAG028559	NONHSAG028559	-	2:95669291-95669588	CCL244CONTROL1	CCL244R1	OK	10.9832	40.3944	1.87886	2.19876	0.04155	0.942621	no
NONHSAG031280	NONHSAG031280	-	20:11781110-11859217	CCL244CONTROL1	CCL244R1	OK	6.29303	0	-2.86651832865001	NA	0.0162	0.942621	no
NONHSAG033054	NONHSAG033054	-	21:46300857-46301909	CCL244CONTROL1	CCL244R1	OK	1.94602	0	-1.5587672246042	NA	0.04055	0.942621	no
NONHSAG033340	NONHSAG033340	-	22:21265336-21270094	CCL244CONTROL1	CCL244R1	OK	115.169	22.5832	-2.35043	-3.88563	0.00015	0.341628	no
NONHSAG035745	NONHSAG035745	-	3:112414247-112416553	CCL244CONTROL1	CCL244R1	OK	1.02199	0	-1.01577586223297	NA	0.0106	0.942621	no
NONHSAG041667	NONHSAG041667	-	5:137614782-137615041	CCL244CONTROL1	CCL244R1	OK	5.33641	0	-2.66366568861032	NA	0.0291	0.942621	no
NONHSAG046873	NONHSAG046873	-	7:6144053-6144254	CCL244CONTROL1	CCL244R1	OK	14.8566	0	-3.98701155388712	NA	0.01935	0.942621	no
NONHSAG054345	NONHSAG054345	-	X:45604589-45711540	CCL244CONTROL1	CCL244R1	OK	1.97457	0.415271	-2.24942	-2.4415	0.0213	0.942621	no
NONHSAG055534	NONHSAG055534	-	X:152157367-152228827	CCL244CONTROL1	CCL244R1	OK	5.18965	0	-2.62985783310023	NA	0.03885	0.942621	no
NONHSAT000313	NONHSAT000313	-	1:1342694-1345998	CCL244CONTROL1	CCL244R1	OK	3.93809	0.889111	-2.14706	-2.54359	0.0229	0.942621	no
NONHSAT004567	NONHSAT004567	-	1:94458392-94586688	CCL244CONTROL1	CCL244R1	OK	1.59048	0	-1.37321944519301	NA	0.04775	0.942621	no
NONHSAT009518	NONHSAT009518	-	1:218517537-218519366	CCL244CONTROL1	CCL244R1	OK	3.3578	1.06243	-1.66015	-2.11766	0.03955	0.942621	no
NONHSAT028830	NONHSAT028830	-	12:56984915-56985713	CCL244CONTROL1	CCL244R1	OK	12.0715	2.61454	-2.20698	-2.44683	0.02535	0.942621	no
NONHSAT032747	NONHSAT032747	-	13:30221771-30229714	CCL244CONTROL1	CCL244R1	OK	1.18612	0	-1.12837259527025	NA	0.04105	0.942621	no
NONHSAT051761	NONHSAT051761	-	16:417383-420540	CCL244CONTROL1	CCL244R1	OK	0.0157404	28.8154	10.8382	0.185731	0.04275	0.942621	no
NONHSAT065873	NONHSAT065873	-	19:36066505-36092637	CCL244CONTROL1	CCL244R1	OK	859.194	343.989	-1.32062	-2.23258	0.02585	0.942621	no
NONHSAT076051	NONHSAT076051	-	2:190202502-190305828	CCL244CONTROL1	CCL244R1	OK	4.67476	0	-2.50455937845967	NA	0.0331	0.942621	no
NONHSAT129023	NONHSAT129023	-	8:128084938-128494384	CCL244CONTROL1	CCL244R1	OK	2.62714	0.0986779	-4.73463	-3.12504	0.033	0.942621	no
NONHSAT133702	NONHSAT133702	-	9:102648607-102668883	CCL244CONTROL1	CCL244R1	OK	1.07056	0	-1.05002100925127	NA	0.04015	0.942621	no
NONHSAT136811	NONHSAT136811	-	X:45604589-45711540	CCL244CONTROL1	CCL244R1	OK	2.78716	0.254596	-3.45252	-2.75422	0.02445	0.942621	no
NONHSAT144986	NONHSAT144986	-	17:2625841-2626561	CCL244CONTROL1	CCL244R1	OK	0.0845259	1.21602	3.84663	0.88752	0.03915	0.942621	no
NR_024191	ATL2	-	2:38522021-38604432	CCL244CONTROL1	CCL244R1	OK	0.0014085	2.06197	10.5156	0.173465	0.03505	0.942621	no
NR_026580	TFDP1	-	13:114239002-114295788	CCL244CONTROL1	CCL244R1	OK	0.00166397	6.73706	11.9833	0.21137	0.03495	0.942621	no
NR_045672	CLIC5	-	6:45866189-46048132	CCL244CONTROL1	CCL244R1	OK	2.3035	0.450085	-2.35556	-2.43017	0.0313	0.942621	no
NR_051962	INVS	-	9:102861501-103063426	CCL244CONTROL1	CCL244R1	OK	0.181905	1.85836	3.35277	1.9391	0.0412	0.942621	no
NR_073428	CWC25	-	17:36956686-36981734	CCL244CONTROL1	CCL244R1	OK	1.06714	0.0015693	-9.40941	-0.302252	0.0409	0.942621	no
NR_103468	LRRC20	-	10:72058725-72142406	CCL244CONTROL1	CCL244R1	OK	0.00167005	3.1943	10.9014	0.319722	0.0389	0.942621	no
NR_104585	UFM1	-	13:38923907-38937144	CCL244CONTROL1	CCL244R1	OK	5.44369	0.000851014	-12.6431	-0.174734	0.01595	0.942621	no
UCSC_TCONS_00001278	UCSC_TCONS_00001278	-	1:219391849-219500273	CCL244CONTROL1	CCL244R1	OK	5.41358	57.6628	3.41299	1.87737	0.0488	0.942621	no
UCSC_TCONS_00005952	UCSC_TCONS_00005952	-	3:14266505-14272302	CCL244CONTROL1	CCL244R1	OK	1.24041	0	-1.1637627728365	NA	0.0167	0.942621	no
UCSC_TCONS_00018388	UCSC_TCONS_00018388	-	10:132011021-132050307	CCL244CONTROL1	CCL244R1	OK	1.40361	0	-1.26520282919793	NA	0.0182	0.942621	no
UCSC_TCONS_00021722	UCSC_TCONS_00021722	-	13:23500256-23596948	CCL244CONTROL1	CCL244R1	OK	1.48101	0	-1.31092755019259	NA	0.03115	0.942621	no
UCSC_TCONS_00022117	UCSC_TCONS_00022117	-	13:111608812-111623935	CCL244CONTROL1	CCL244R1	OK	1.62848	0	-1.39422875754224	NA	0.0163	0.942621	no
UCSC_TCONS_00024486	UCSC_TCONS_00024486	-	16:84818676-84829057	CCL244CONTROL1	CCL244R1	OK	0	1.15106	1.10504776673922	NA	0.0293	0.942621	no
UCSC_TCONS_00024577	UCSC_TCONS_00024577	-	16:10715084-10716242	CCL244CONTROL1	CCL244R1	OK	4.77268	0	-2.52924125389089	NA	0.00895	0.942621	no
UCSC_TCONS_00025519	UCSC_TCONS_00025519	-	17:76982942-76987493	CCL244CONTROL1	CCL244R1	OK	0	2.2128	1.68383117440132	NA	0.0293	0.942621	no
UCSC_TCONS_00027385	UCSC_TCONS_00027385	-	19:47742377-47747476	CCL244CONTROL1	CCL244R1	OK	1.4637	0	-1.30082659253349	NA	0.0271	0.942621	no
UCSC_TCONS_l2_00020925	UCSC_TCONS_l2_00020925	-	4:184718945-184719817	CCL244CONTROL1	CCL244R1	OK	0	3.90902	2.2954350444473	NA	0.0293	0.942621	no
lnc-ANG-1:1	lnc-ANG-1:1	-	14:21152258-21175279	CCL244CONTROL1	CCL244R1	OK	1.51656	0.00225444	-9.39382	-0.186176	0.0256	0.942621	no
lnc-MBIP-2:3	lnc-MBIP-2:3	-	14:36539632-36704816	CCL244CONTROL1	CCL244R1	OK	2.11754	0	-1.64040807085893	NA	0.00565	0.942621	no
lnc-TNR-2:3	lnc-TNR-2:3	-	1:175126122-175162135	CCL244CONTROL1	CCL244R1	OK	7.02813	1.01602	-2.79021	-2.71114	0.02145	0.942621	no
